1 **Septins coordinate cell wall integrity and lipid metabolism in**  
2 **a sphingolipid-dependent process**

3

4 Alexander Mela<sup>1</sup> and Michelle Momany<sup>1\*</sup>

5

6

7

8 <sup>1</sup>Fungal Biology Group and Plant Biology Department, University of Georgia,

9 2502 Miller Plant Science Building, Athens, GA 30602

10

11

12 \* Corresponding Author:

13 Email: [mmomany@uga.edu](mailto:mmomany@uga.edu) (MM)

14

15 **Keywords:** Septins; MAPK Signaling; Cell wall integrity; Sterol Rich Domains

16

17 **Abstract**

18 During normal development and response to environmental stress, fungi must coordinate synthesis of the  
19 cell wall and plasma membrane. Septins, small cytoskeletal GTPases, colocalize with sterol-rich regions  
20 in the membrane and facilitate recruitment of cell wall synthases during dynamic wall remodeling. In this  
21 study we show that null mutants of the core septins in *Aspergillus nidulans*,  $\Delta aspA^{cdc11}$ ,  $\Delta aspB^{cdc3}$ ,  
22  $\Delta aspC^{cdc12}$ , and  $\Delta aspD^{cdc10}$ , are sensitive to cell wall-disturbing agents known to activate the cell wall  
23 integrity MAPK pathway and that this sensitivity can be remediated by osmotic support. Septin null  
24 mutants showed changes in cell wall polysaccharide composition and organization and in chitin synthase  
25 localization. Double mutant analysis suggested core septins function downstream of the final kinase of the  
26 cell wall integrity pathway. Null mutants of the core septins and of noncore septin AspE were resistant to  
27 ergosterol and sphingolipid biosynthesis-disrupting agents. Septins were mislocalized after treatment with  
28 sphingolipid biosynthesis-disrupting agents and, to a lesser extent, phosphoinositide biosynthesis-  
29 disrupting agents. When septin deletion mutants were challenged with both membrane-disturbing and cell  
30 wall-disturbing agents in combination, remediation of the membrane defect restored proper growth, but  
31 remediation of the cell wall defect did not. Our data suggest that septins are required for proper  
32 coordination of the cell wall integrity pathway and lipid metabolism and that this role requires  
33 sphingolipids.

34

## 35 Introduction

36 The cell wall and plasma membrane (PM) are the primary lines of defense against environmental insults  
37 for fungal cells. With the large surface area of hyphal networks and intimate contact with the surrounding  
38 media, fungi encounter many stresses, ranging from ion imbalance to predation. The cell wall contains  
39 several polysaccharide constituents: chitin provides the rigid framework of the cell wall,  $\beta$ -glucan  
40 maintains the shape, and mannans form the outermost, protective layer (1-6). Precise regulation of cell  
41 wall and plasma membrane architecture is attained by tightly coordinated signaling pathways which  
42 control genes responsible for maintaining homeostasis between the intracellular and extracellular  
43 environments.

44 Septins are highly conserved small GTPase cytoskeletal proteins that function as molecular scaffolds for  
45 dynamic cell wall and plasma membrane-remodeling, as well as diffusion barriers restricting movement  
46 of membrane and cell wall-associated molecules (7-14). The *Saccharomyces cerevisiae* septins Cdc3,  
47 Cdc10, Cdc11, and Cdc12 have been termed ‘core septins’ because they are monomers which assemble  
48 into non-polar heterooligomers and micrometer-scale higher order structures in the form of bars, rings, or  
49 gauzes (15-18). *A. nidulans* contains four orthologous septin proteins: AspA<sup>Cdc11</sup>, AspB<sup>Cdc3</sup>, AspC<sup>Cdc12</sup>,  
50 and AspD<sup>Cdc10</sup>, as well as AspE, which has no known *S. cerevisiae* orthologue (19). *A. nidulans* contains  
51 two distinct subpopulations of heterooligomers; an octameric oligomer consisting of all four core septins  
52 in the same order as proposed in *S. cerevisiae* (AspA<sup>Cdc11</sup>-AspC<sup>Cdc12</sup>-AspB<sup>Cdc3</sup>-AspD<sup>Cdc10</sup>-AspD<sup>Cdc10</sup>-  
53 AspB<sup>Cdc3</sup>-AspC<sup>Cdc12</sup>-AspA<sup>Cdc11</sup>), and a second hexameric oligomer, with the proposed order (AspA<sup>Cdc11</sup>-  
54 AspC<sup>Cdc12</sup>-AspB<sup>Cdc3</sup>-AspB<sup>Cdc3</sup>-AspC<sup>Cdc12</sup>-AspA<sup>Cdc11</sup>)(12, 13, 20). For clarity, we will refer to  
55 AspA<sup>Cdc11</sup>, AspB<sup>Cdc3</sup>, and AspC<sup>Cdc12</sup> as ‘core hexamer septins’; AspA<sup>Cdc11</sup>, AspB<sup>Cdc3</sup>, AspC<sup>Cdc12</sup>, and  
56 AspD<sup>Cdc10</sup> as ‘core octamer septins’; and AspE as a ‘non-core septin’ because it does not assemble into  
57 oligomeric structures, though it is required for higher order structure assembly at the multicellular stage  
58 (20, 21).

59 Previous studies in *Candida albicans* have shown that septins provide the scaffolding for cell wall  
60 proteins via the Cell Wall Integrity (CWI) MAPK signaling pathway (7, 9, 22-24). The cell wall  
61 integrity pathway, along with the other major MAPK signaling pathways (High Osmolarity Glycerol  
62 (HOG), cAMP-PKA, Target of Rapamycin (TOR), Calcineurin/Calcium, and Mating/Pheromone  
63 response pathways) are highly conserved across the Kingdom Fungi, and have been shown to undergo  
64 extensive cross-talk to coordinate virtually all biological functions in the cell, from expansion and  
65 division to asexual reproduction (25-32).

66 Sphingolipids are long chain base-containing lipids (33) that are metabolized in a highly conserved  
67 pathway in plants, animals, and fungi; sphingolipid metabolism shares direct connections to other major  
68 metabolic pathways, such as sterol metabolism and fatty acid and phospholipid synthesis (34).

69 Sphingolipid pathway intermediates, such as phytosphingosine, have been shown to be involved in CWI  
70 pathway signaling in *S. cerevisiae* (33, 35). Sterol rich domains (SRDs), also called ‘lipid rafts’ or ‘lipid  
71 microdomains,’ are regions of the plasma membrane enriched in specific classes of lipids, including  
72 sterols (ergosterol, the major sterol found in most fungi (36)), sphingolipids, and phosphoinositides (37,  
73 38), which have been shown to be functionally important for maintenance of cell polarity (39).

74 Membrane organization, plasticity, and overall integrity have been attributed to sphingolipid, sterol, and  
75 glycerophospholipid interactions (40). *In vitro* work has shown that yeast septins bind directly to the  
76 phosphoinositides PIP<sub>2</sub>, PI(4,5)P<sub>2</sub>, PI(5)P, and PI(4)P (41-44). Septins have also been shown to  
77 genetically interact with Sur2, a sphinganine C4-hydroxylase which catalyzes the conversion of  
78 sphinganine to phytosphingosine in sphingolipid biosynthesis (45), and to physically interact with  
79 GTPases, Bud1 and Cdc42 to maintain sphingolipid-dependent diffusion barriers at cell membranes in  
80 yeast (46). Interdependent colocalization of septins and sterol rich microdomains have been described in  
81 a number of *in vivo* and *in vitro* systems (47, 48). In the dimorphic fungus *U. maydis*, septins and sterol  
82 rich domains depend on each other to localize properly at the hyphal tip for cell signaling and cell polarity  
83 establishment (49). In the budding yeast *S. cerevisiae*, long-chain sphingolipids have been implicated in

84 maintaining asymmetric distribution and mobility of some membrane-spanning molecules, such as  
85 multidrug resistance transporters (50). In contrast to these findings, a more recent comprehensive study  
86 of protein segregation during cell division in budding yeast found that the majority of ER and PM  
87 proteins with transmembrane domains were actually symmetrically segregated, however septins were  
88 shown to be responsible for partitioning of the PM-associated ER at the bud neck, thereby restricting  
89 diffusion of ER lumen and a particular set of membrane-localized proteins (51).

90 Recent work has started to unravel the functional connections between the septins, cell wall integrity  
91 MAPK pathway signaling, and lipid metabolism, however most studies have focused on a small sub-set  
92 of septin monomers and/or were conducted in primarily yeast-type fungi (52-57). Here we show in the  
93 filamentous fungus *A. nidulans* that the core hexamer septins, AspA<sup>Cdc11</sup>, AspB<sup>Cdc3</sup>, and AspC<sup>Cdc12</sup>, are  
94 required for proper coordination of the cell wall integrity pathway, that all septins are involved in lipid  
95 metabolism, and that these roles require sphingolipids.

## 96 **Results**

97 ***Core hexamer Septins are hypersensitive to cell wall-disturbing agents.*** To determine whether *A.*  
98 *nidulans* septins are important for cell wall integrity, we used spore dilution assays to test the growth of  
99 septin deletion mutants on media containing a variety of known cell wall-disturbing agents. Wild type and  
100 septin null mutants were tested on Calcofluor White (CFW) and Congo Red (CR), cell wall polymer-  
101 intercalating agents that perturb chitin and  $\beta$ -1,3-glucan, respectively; Caspofungin (CASP), an inhibitor  
102 of  $\beta$ -1,3-glucan synthase; and Fludioxonil (FLU), a phenylpyrrol fungicide that antagonizes the group III  
103 histidine kinase in the osmosensing pathway and consequently affects cell wall integrity pathway  
104 signaling (**Fig 1**)(58-67). Septin mutants  $\Delta aspA^{cdc11}$ ,  $\Delta aspB^{cdc3}$ , and  $\Delta aspC^{cdc12}$  showed hypersensitivity to  
105 CFW, CR, CASP, and FLU;  $\Delta aspD^{cdc10}$  displayed no obvious sensitivity to CFW, CR, and FLU, and mild  
106 sensitivity to CASP (See **S1 Table** for list of strains used in this study). The  $\Delta aspE$  mutant showed no  
107 obvious sensitivity to CFW, CASP, and FLU, and very mild sensitivity to CR. (**Fig 1A**).

108 ***Septin mutant hypersensitivity to cell wall-disturbing agents can be remediated by osmotic stabilization.***

109 One hallmark of cell wall integrity defects is rescue by the addition of an osmotic stabilizer, such as  
 110 sorbitol or sucrose. The addition of exogenous 1.2M sorbitol partially remediated the sensitivity to CASP  
 111 and fully remediated the sensitivity to CFW, CR, and FLU for  $\Delta aspA^{cdc11}$ ,  $\Delta aspB^{cdc3}$ , and  $\Delta aspC^{cdc12}$  (**Fig**  
 112 **1B**). The mild sensitivity of  $\Delta aspD^{cdc10}$  to CASP was also fully remediated by sorbitol. The addition of  
 113 sorbitol did not change sensitivity to cell wall disturbing agents for  $\Delta aspE$ , except for slightly improved  
 114 growth with CR. The osmotic remediation of growth defects in the mutants indicates that their sensitivity  
 115 to cell wall-disturbing agents is likely the result of a cell wall integrity defect.

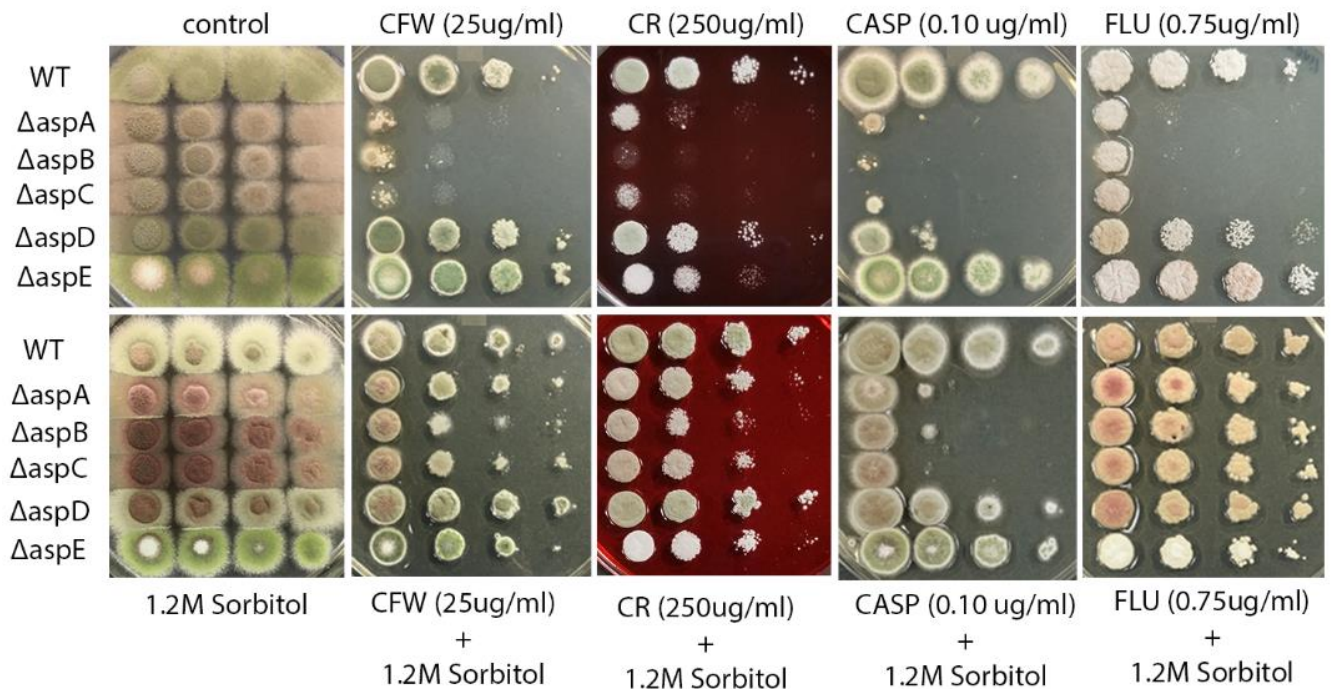

116

117 **Fig 1. Core septin null mutants exhibit hypersensitivity to cell wall-disturbing agents, which can be**  
 118 **remediated by osmotic support.** (Top Row) Solid media spotting assay. WT and septin null mutants  
 119  $\Delta aspA^{cdc11}$ ,  $\Delta aspB^{cdc3}$ ,  $\Delta aspC^{cdc12}$ ,  $\Delta aspD^{cdc10}$ , and  $\Delta aspE$  were tested for sensitivity by spotting decreasing  
 120 spore concentrations on complete medium plates with or without cell wall-disturbing agents Calcofluor  
 121 White (CFW), Congo Red (CR), Caspofungin (CASP), and Fludioxonil (FLU) at the indicated final  
 122 concentrations. (Bottom Row) WT and septin null mutants were tested for osmotic remediation of  
 123 hypersensitivity to cell wall-disturbing agents, by spotting decreasing spore concentrations on media  
 124 amended with exogenous 1.2M sorbitol. Spore concentrations were  $10^7$  conidia/mL –  $10^4$  conidia/mL  
 125 for all assays. Differences in colony color result from changes in spore production, spore pigment, and  
 126 production of secondary metabolites under stress.  $N \geq 5$

127 **Core septin null mutants have altered chitin and  $\beta$ -1,3-glucan localization.** Because the core septin  
128 mutants showed sensitivity to cell wall-disturbing agents consistent with action via the cell wall integrity  
129 pathway, we predicted that there might be differences in cell wall polymer localization in the mutants. To  
130 examine cell wall polymer localization, we did live-cell imaging of WT and  $\Delta aspB^{cdc3}$  (used as a proxy  
131 for the core septin mutants which exhibited hypersensitivity to cell wall-disturbing treatments). Conidia  
132 were incubated on coverslips in liquid media, stained with CFW or aniline blue to observe chitin and  $\beta$ -  
133 1,3-glucan, respectively, and immediately observed by fluorescence microscopy. Z-stack images were  
134 analyzed one-by-one, as well as compressed into maximum projection images to visualize the  
135 fluorescence signal in the entire hyphal structure (**Fig 2**). As previously reported,  $\Delta aspB^{cdc3}$  showed more  
136 presumptive branch initials per hyphal compartment than WT (21). The aniline blue staining showed a  
137 reduction of labeling at all  $\Delta aspB^{cdc3}$  hyphal tips. Smaller, less intense aniline blue labeling also occurred  
138 at presumptive branch initials (**Fig 2A**). The CFW staining of  $\Delta aspB^{cdc3}$  showed a shift of the tip band of  
139 staining closer to the hyphal apex and a less well-defined endocytic collar zone (**Fig 2B**). These data  
140 show that cell wall architecture is altered in the core septin null mutants.

141 **Septin null mutants have higher levels of chitin.** Previous studies have shown that perturbations to one  
142 cell wall component often trigger compensatory changes to others via the cell wall integrity pathway (28,  
143 68, 69). To analyze the cell wall composition of septin mutants, two independent biological replicates of  
144 a diagnostic glycosyl linkage analysis (70) were conducted to quantify the cell wall polysaccharide  
145 composition of WT,  $\Delta aspB^{cdc3}$  (a proxy for the core septin null mutants which showed hypersensitivity  
146 to cell wall-disturbing agents), and  $\Delta aspE$  (non-core septin mutant)(**S1 Fig**). All samples contained 3-  
147 and 4-linked glucose as the primary cell wall components, as well as 4-linked N-acetylglucosamine (the  
148 monomer of chitin) and a relatively minor amount of mannan. The septin mutants  $\Delta aspB^{cdc3}$  and  $\Delta aspE$   
149 showed 7% and 2% increases in the average area of the detected linkage peak for 4-GlcNAc compared to  
150 WT, respectively; the amount of 4-Glc and of mannan (data not shown) did not show significant

151 differences between samples. These data indicate an increase in chitin content in the cell walls of core  
152 septin null mutants.

153

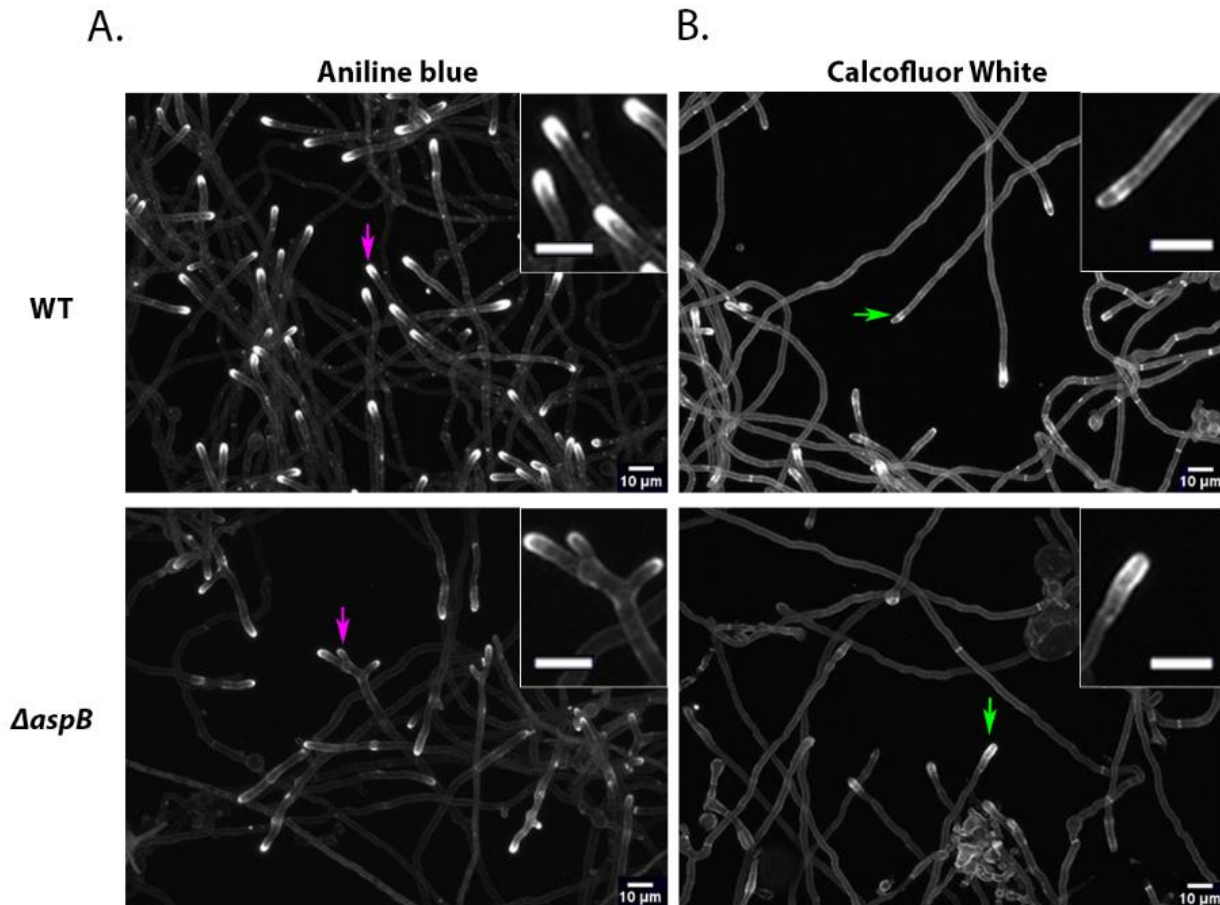

154  
155

156 **Fig 2. Cell wall staining reveals unique patterns of chitin and  $\beta$ -1,3-glucan deposition in core septin**  
157 **null mutants.** (A) WT and  $\Delta aspB^{cdc3}$  cells were incubated for approximately 14h and (A) stained with  
158 aniline blue to visualize  $\beta$ -1,3-glucan or (B) stained with Calcofluor White to visualize chitin. Images  
159 were captured with a fluorescence microscope and converted to black and white for better visualization.  
160 Representative images are shown from at least three independent biological replicates, with  $\geq 100$  cells  
161 observed each. Magenta arrows in panel A denote hyphal tips with representative  $\beta$ -1,3-glucan  
162 deposition. Green arrows in panel B denote hyphal tips with representative chitin deposition. Insets  
163 show enlargement of area around the arrows. Imaging conducted with LSM-880 confocal fluorescence  
164 microscope with 40X oil immersion. Scale bars = 10 $\mu$ m.  $N \geq 3$

165

166



167 ***Chitin synthase localization is altered in core septin null mutants.*** Membrane-spanning cell wall  
168 synthases are the ultimate effectors of the cell wall integrity pathway. To determine the localization of  
169 synthases, a chitin synthase B-GFP (*chsB-GFP*) strain was crossed with septin deletion strain  $\Delta aspA^{cdc11}$   
170 (as a proxy for core septin mutants). The  $\Delta aspA^{cdc11}$ , *chsB-GFP* strain showed conspicuous differences in  
171 chitin synthase localization patterns compared to WT (**Fig 3**). In WT, the chitin synthase-GFP signal was  
172 at the tips of virtually all branches, presumptive branch initials, and apical hyphal tips. In the septin null  
173 mutant  $\Delta aspA^{cdc11}$ , GFP signal was absent in most presumptive branch initials, but present in relatively  
174 longer side branches and in the apical hyphal tip(s) (>10  $\mu\text{m}$ ) (**Fig 3A-B**). Intriguingly, the chitin label  
175 calcofluor white was more intense in the septin deletion strain consistent with the increase in 4-GlcNAc  
176 levels seen in polysaccharide analysis. Calcofluor white labeling also showed that the polymer chitin was  
177 present throughout the hyphae in both the WT and septin deletion strains suggesting that chitin synthases  
178 had been active in both, but perhaps were not retained as long in the presumptive branch initials of the  
179 septin deletion mutant. These data support the hypothesis that septins play a role in recruitment and/or  
180 retention of cell wall synthases to the proper locations at the plasma membrane during growth and  
181 development.

182 ***Double mutant analyses suggest core septins modulate the cell wall integrity pathway downstream of***  
183 ***the kinase cascade.*** To determine whether there are genetic interactions between the septins and the cell  
184 wall integrity pathway kinases, double mutants were generated by sexual crosses and analyzed for  
185 epistasis. The first cell wall integrity pathway kinase, PkcA<sup>Pkc1</sup> (ANID\_00106), is essential in *A. nidulans*,  
186 and so null alleles could not be utilized for double mutant analysis. A null allele of the final kinase in the  
187 CWI MAPK signaling cascade, MpkA<sup>Slh2</sup> (ANID\_11786), was crossed with  $\Delta aspB^{cdc3}$  and  $\Delta aspE$  and  
188 progeny were analyzed with cell wall-disturbing treatments.

189

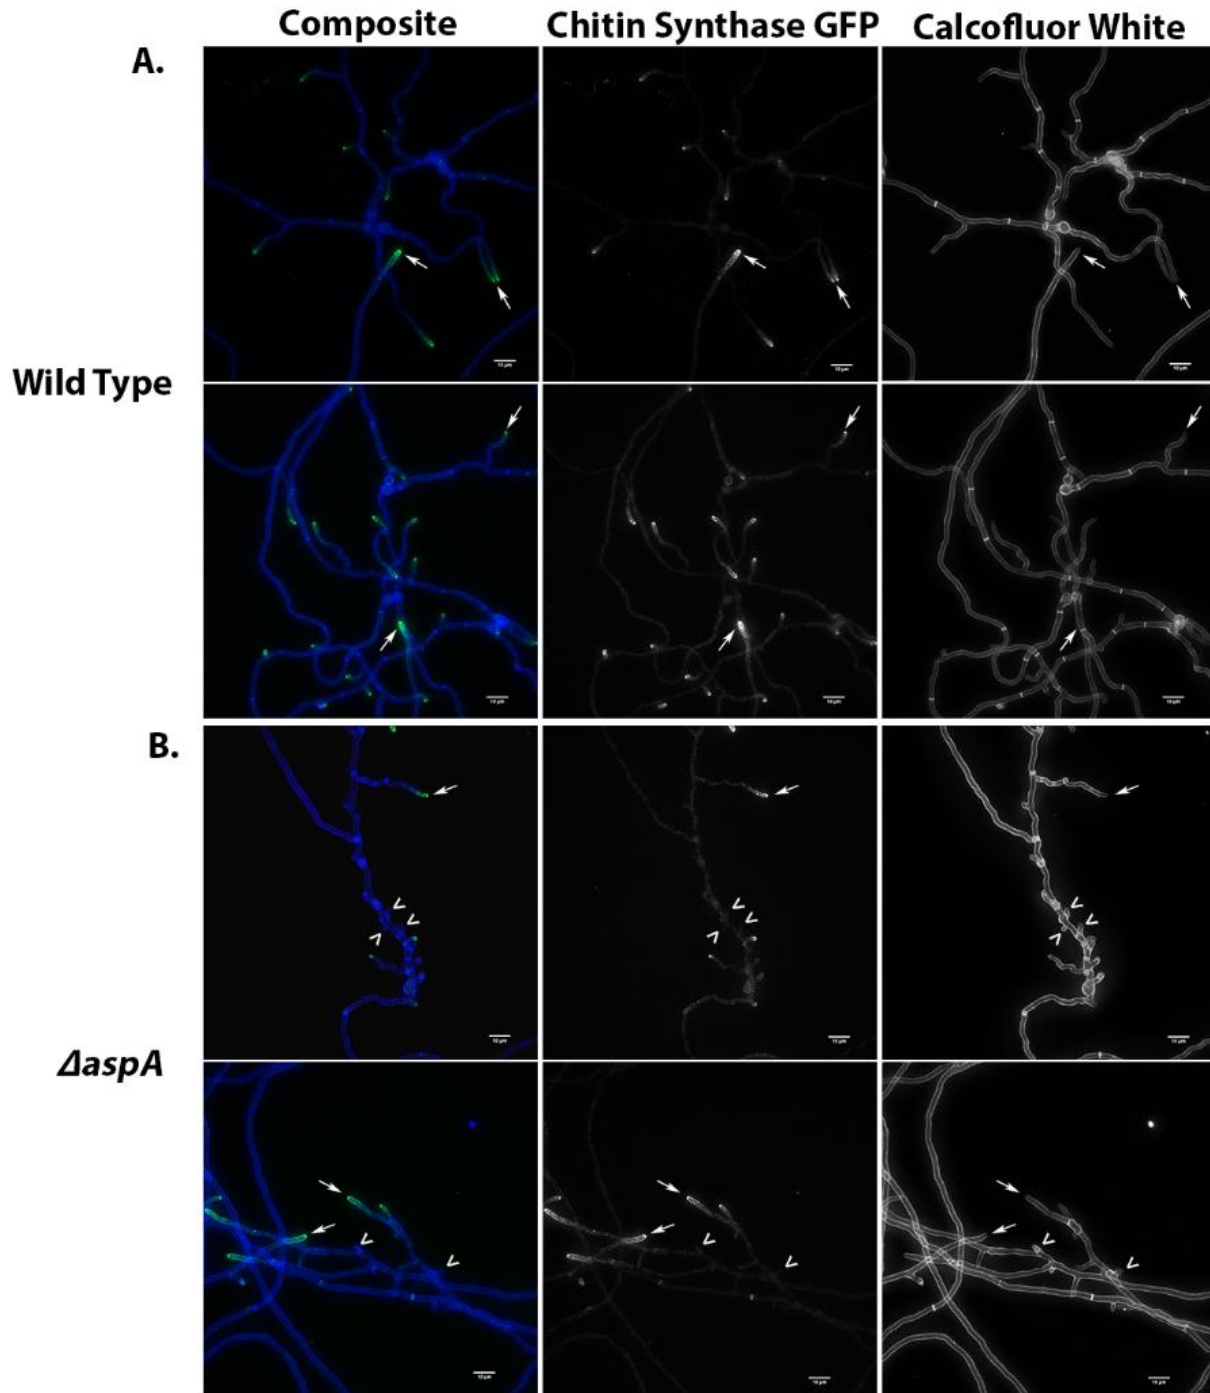

190

191 **Fig 3. Chitin synthase is mislocalized in septin null mutant  $\Delta aspA^{cdc11}$ .** (A) chitin synthase B-GFP  
192 strain in WT background shows signal at virtually all hyphal branches and presumptive branch initials  
193 with the most signal localized to the main hyphal tip(s) (Columns 1-2). (B) chitin synthase B-GFP in a  
194  $\Delta aspA^{cdc11}$  mutant background localizes primarily to main hyphal branches and only in a few presumptive  
195 branch initials. Calcofluor White labeling shows the presence of the polymer chitin at main hyphal tips,  
196 branches, and putative branch initials in both WT and  $\Delta aspA^{cdc11}$  strains (Column 3). Representative  
197 images are shown from at least three independent biological replicates, with  $\geq 100$  cells observed. White

198 arrows highlight hyphal branches and tips. White arrow heads highlight putative branch initials. Imaging  
199 conducted with Deltavision I deconvolution inverted fluorescence microscope. Scale bars = 10 $\mu$ m. N $\geq$ 3.

200

201

202

203 If the septins are directly in the CWI pathway, we would expect double mutants to show the same  
204 phenotypes as the parental null mutant that acts earliest. If the septins are in a parallel pathway or  
205 alternate node which also affects cell wall integrity, we would expect a novel/synergistic phenotype in the  
206 double mutants.

207 Spore dilution assays were conducted, challenging the double mutants and the parental strains with cell  
208 wall-disturbing treatments. The double mutants,  $\Delta aspB^{cdc3} \Delta mpkA^{slt2}$  and  $\Delta aspE \Delta mpkA^{slt2}$ , displayed a  
209 colony-level radial growth defect and reduced conidiation which phenocopied the  $\Delta mpkA^{slt2}$  single  
210 mutant. When challenged with low concentrations of CASP and CFW the  $\Delta aspB^{cdc3} \Delta mpkA^{slt2}$  mutants  
211 were more sensitive than  $\Delta aspB^{cdc3}$  and very similar in sensitivity to  $\Delta mpkA^{slt2}$ , suggesting that the core  
212 septins act downstream of the cell wall integrity kinase  $mpkA^{slt2}$  (**Fig 4**). When challenged with CASP and  
213 CFW, the  $\Delta aspE \Delta mpkA^{slt2}$  mutants didn't phenocopy either parent; they were more sensitive than  $\Delta aspE$   
214 and less sensitive than  $\Delta mpkA^{slt2}$ , suggesting that AspE affects cell wall integrity through a parallel  
215 pathway or alternate node. These data suggest that the core septins modulate the cell wall integrity  
216 pathway downstream of  $mpkA^{SLT2}$ . No clear epistatic relationship could be determined between AspE and  
217 the CWI pathway kinase.

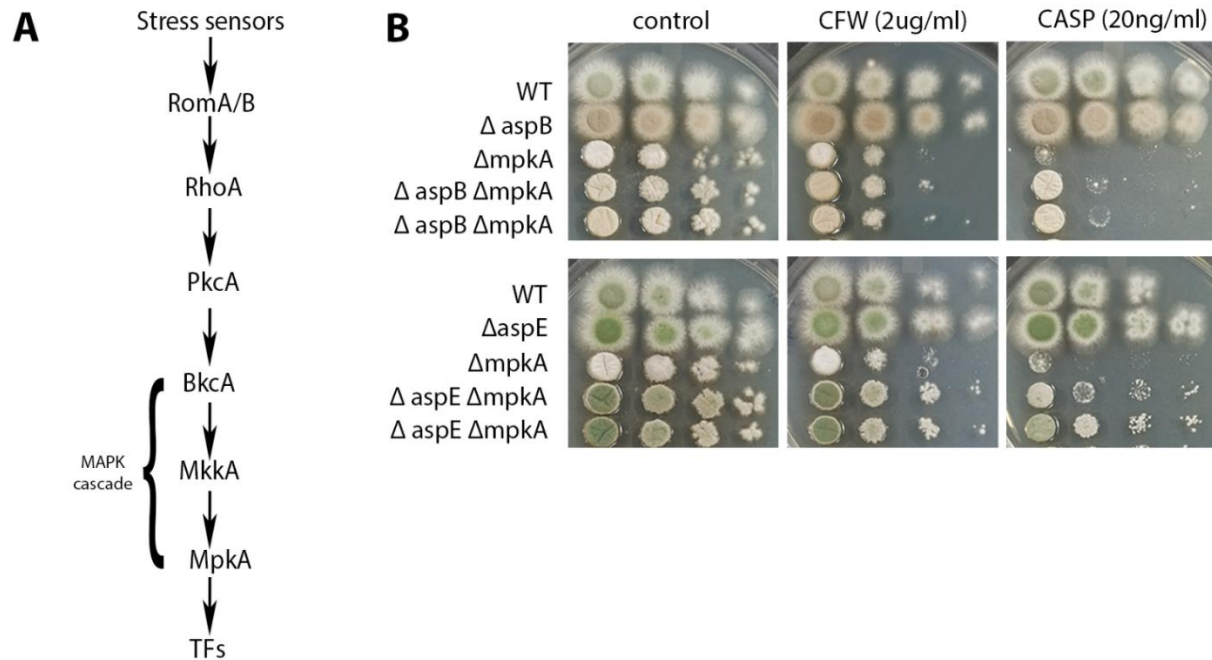

218

219 **Fig 4. Double mutant analyses suggest core septins modulate the cell wall integrity pathway**  
 220 **downstream of the kinase cascade.** (A) Simplified schematic diagram of the *A. nidulans* cell  
 221 wall integrity MAPK signaling pathway (71). (B) Solid media spotting assays. (Top) WT,  
 222  $\Delta aspB^{cdc3}$ ,  $\Delta mpkA^{slt2}$ , and two  $\Delta aspB^{cdc3} \Delta mpkA^{slt2}$  double mutant strains, were tested for  
 223 sensitivity by spotting decreasing spore concentrations on complete media plates with or without  
 224 cell wall-disturbing agents. (Bottom) WT,  $\Delta aspE$ ,  $\Delta mpkA^{slt2}$ , and two  $\Delta aspE \Delta mpkA^{slt2}$  double  
 225 mutant strains were tested for sensitivity by spotting decreasing spore concentrations on  
 226 complete media plates with or without cell wall-disturbing agents. Differences in colony color  
 227 result from changes in spore production, spore pigment, and production of secondary metabolites  
 228 under stress. Transcription Factors, (TFs); Calcofluor White, (CFW); Caspofungin (CASP).  
 229 Spore concentrations were [ $10^6$  conidia/mL –  $10^3$  conidia/mL] for all assays in figure. N=3

230

231

232 **Core septin null mutants are insensitive to treatments which disrupt the Ca<sup>2+</sup>/Calcineurin, cAMP-**  
 233 **PKA, or TOR Pathways.** One possible explanation for the observed sensitivity to cell wall-disturbing  
 234 agents could be that septins are involved in ‘cross-talk’ with other MAPK signaling pathways that have  
 235 been shown to interact with cell wall integrity pathway signaling, such as the Calcium/Calcineurin  
 236 (CAMK) signaling pathway. To test this possibility, calcium chloride, EGTA (calcium chelating agent),  
 237 and FK-506 (calcineurin inhibitor) were added to each treatment (S2 Fig) (72-74). The treatments

238 showed no obvious colony growth defects, suggesting that Ca<sup>2+</sup>/Calcineurin signaling pathway crosstalk  
239 does not significantly contribute to the observed sensitivity of septin null mutants to cell wall-disturbing  
240 agents.

241 Another pathway closely associated with cell wall integrity, lipid biosynthesis, and lipid signaling is the  
242 TOR MAPK signaling pathway (75). To test the involvement of septins in this signaling pathway, septin  
243 null mutants were challenged with rapamycin (a potent inhibitor of the TOR pathway), as well as  
244 methylxanthine derivatives and TOR pathway inhibitors caffeine and theophylline (76-78). There were  
245 no observable growth defects in the presence of rapamycin (final concentration was 600ng/mL, which is  
246 approximately 3-fold higher than inhibitory concentration for known TOR pathway mutants) in the septin  
247 null mutants compared to WT (**S2 Fig**) (79, 80). Caffeine and theophylline have been shown to interfere  
248 with phosphodiesterase activity in the cAMP-PKA and TOR pathways and  $\Delta pkaA^{tpk1}$  and  $\Delta tor1^{torA}$   
249 mutants show hypersensitivity to caffeine treatment which cannot be remediated by exogenous sorbitol  
250 (58, 78, 81-83). If the septins were involved in crosstalk between the cAMP-PKA or TOR pathways and  
251 the CWI pathway, we would predict that septin null mutants would be hypersensitive to caffeine and  
252 theophylline treatments. To our surprise, only  $\Delta aspE$  showed hypersensitivity to both caffeine and  
253 theophylline, and the hypersensitivity was not remediated by an osmotic stabilizer (**S2 Fig and data not**  
254 **shown**). These data suggest that TOR, cAMP-PKA, and Calcium/Calcineurin signaling pathways do not  
255 contribute to the cell wall sensitivity or plasma membrane resistance phenotypes in the core septin null  
256 mutants, but the cAMP-PKA or TOR pathways may contribute to the phenotypes of the septin *aspE* null  
257 mutant.

258 ***Core septin null mutants show increased resistance to disruption of ergosterol biosynthesis.*** Recent  
259 work has shown that the cell wall integrity pathway in *S. cerevisiae* is regulated by sphingolipids and  
260 ergosterol, facilitating proper deposition of cell wall polymers at actively growing regions and sites of  
261 septation (38, 55). It is well-established that septins localize to sites of polarized growth and septation,  
262 where highly dynamic remodeling of the plasma membrane and cell wall via membrane-bound synthases

263 and polarity-associated proteins takes place (84). These highly dynamic plasma membrane SRDs in fungi  
264 often contain ergosterol and sphingolipids. To determine whether loss of septins might affect one of the  
265 major SRD-associated lipids, each septin mutant was challenged by drug treatments disrupting the  
266 ergosterol biosynthesis pathway in spore dilution assays (**Fig 5**). These assays included an azole  
267 treatment (Itraconazole), an allylamine treatment (Terbinafine), and a polyene treatment (Natamycin),  
268 which each impact a different step in ergosterol biosynthesis (**Fig 5A**). Allylamines (Terbinafine) inhibit  
269 the conversion of squalene to squalene epoxide, azoles (Itraconazole) inhibit the conversion of lanosterol  
270 to 4,4-dimethylcholesta-8,14,24-trienol, and polyenes bind directly to ergosterol (85).

271 The  $\Delta aspA^{cdc11}$ ,  $\Delta aspB^{cdc3}$ ,  $\Delta aspC^{cdc12}$ , and  $\Delta aspD^{cdc10}$  mutants were more resistant to Itraconazole and  
272 Terbinafine than WT or  $\Delta aspE$ . Only  $\Delta aspA^{cdc11}$  and  $\Delta aspE$  showed strong resistance to Natamycin  
273 treatment (**Fig 5B**). The addition of exogenous 50 $\mu$ M ergosterol was able to fully remediate the  
274 sensitivity of all null mutant strains and WT to Itraconazole, Terbinafine, and Natamycin, suggesting  
275 ergosterol was indeed the primary lipid component disrupted by these treatments (**Fig 5C**). These data  
276 suggest that all five septins are involved in monitoring ergosterol metabolism and/or deposition.

### 277 *Core hexamer septin null mutants show altered sensitivity to disruption of sphingolipid biosynthesis.*

278 Ergosterol is found in fungal sterol-rich domains in the plasma membrane and has been shown to be  
279 important for cell wall integrity pathway function in other fungi (38). We hypothesized that septins could  
280 indirectly modulate MAPK pathways, particularly the CWI pathway, through interactions with plasma  
281 membrane lipids within sterol rich domains. Sphingolipids are a class of plasma membrane lipids which  
282 has been shown to be associated with sterol-rich domains, along with sterols and phosphoinositides, and  
283 therefore are likely targets for septin-mediated interactions at the membrane. To determine whether loss  
284 of septins impacts sphingolipid metabolism in *A. nidulans*, the septin null mutants were challenged with  
285 sphingolipid biosynthesis disrupting agents Myriocin and Aureobasidin A (AbA) (**Fig 6**).

286

287

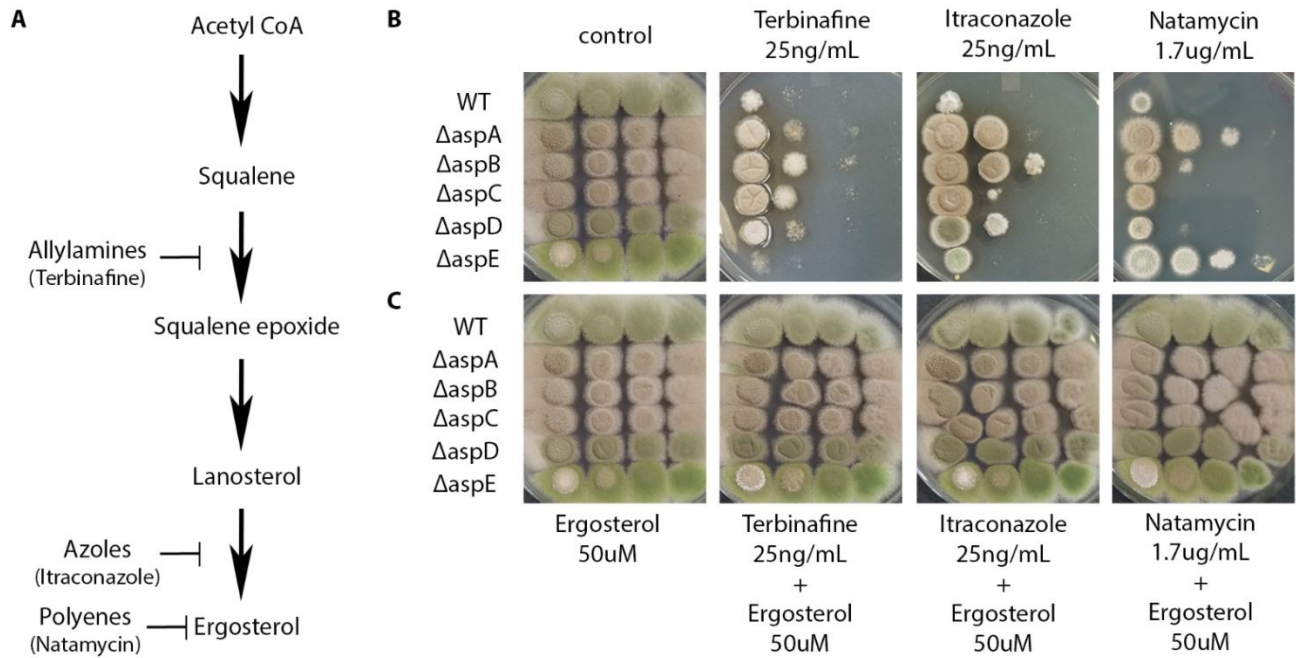

288

289

290 **Fig 5. Core septin null mutants show increased resistance to disruption of ergosterol biosynthesis,**  
 291 **and  $\Delta aspA^{cdc11}$  and  $\Delta aspE$  show increased resistance to the ergosterol-binding polyene drug**  
 292 **Natamycin.** (A) A simplified schematic diagram of the ergosterol biosynthesis pathway, showing where  
 293 allylamines, azoles, and polyene antifungal agents affect each step (85). (B) WT and septin null mutants  
 294  $\Delta aspA^{cdc11}$ ,  $\Delta aspB^{cdc3}$ ,  $\Delta aspC^{cdc12}$ ,  $\Delta aspD^{cdc10}$ , and  $\Delta aspE$ , were tested for sensitivity by spotting  
 295 decreasing spore concentrations on solid media with or without the ergosterol biosynthesis-disturbing  
 296 agents Terbinafine, Itraconazole, and Natamycin at concentrations shown. (C) Remediation of sensitivity  
 297 to ergosterol biosynthesis-inhibiting treatments. WT and septin null mutants  $\Delta aspA^{cdc11}$ ,  $\Delta aspB^{cdc3}$ ,  
 298  $\Delta aspC^{cdc12}$ ,  $\Delta aspD^{cdc10}$ , and  $\Delta aspE$ , were tested for the ability of exogenous ergosterol (50 $\mu$ M) to  
 299 remediate sensitivity to ergosterol biosynthesis-disturbing agents. Differences in colony color result from  
 300 changes in spore production, spore pigment, and production of secondary metabolites under stress. Spore  
 301 concentrations were [10<sup>7</sup> conidia/mL – 10<sup>4</sup> conidia/mL] for all assays in figure. N=3

302

303

304 Myriocin disrupts the first committed step of the biosynthetic pathway, converting palmitoyl-coA and  
 305 serine to 3-ketodihydrosphingosine, preventing the accumulation of downstream intermediates, such as  
 306 ceramides and sphingoid bases like phytosphingosine (PHS), as well as complex sphingolipids at the final

307 steps of the pathway (**Fig 6A**) (37, 47). Aureobasidin A inhibits IPC synthase, disrupting the conversion  
308 of inositolphosphorylceramide from phytoceramide, and consequently causing the accumulation of  
309 intermediates such as phytosphingosine, which has been shown to be toxic at high concentrations (**Fig**  
310 **6A**) (86).

311 The  $\Delta aspA^{cdc11}$ ,  $\Delta aspB^{cdc3}$ , and  $\Delta aspC^{cdc12}$  mutants were more sensitive to Myriocin than the other septin  
312 null mutants or WT (**Fig 6B**).  $\Delta aspA^{cdc11}$ ,  $\Delta aspB^{cdc3}$ , and  $\Delta aspC^{cdc12}$  were also more resistant to AbA  
313 than  $\Delta aspD^{cdc10}$ ,  $\Delta aspE$ , and WT (**Fig 6B**). Strikingly, the addition of exogenous PHS (15 $\mu$ M) to the  
314 Myriocin treatment fully remediated the sensitivity of  $\Delta aspA^{cdc11}$ ,  $\Delta aspB^{cdc3}$ , and  $\Delta aspC^{cdc12}$  (**Fig 6C**).  
315  $\Delta aspA^{cdc11}$ ,  $\Delta aspB^{cdc3}$ , and  $\Delta aspC^{cdc12}$  were also more resistant to higher concentrations (20 $\mu$ M) of the  
316 phytosphingosine intermediate (PHS), which has been shown to be toxic at high concentrations (**Fig 6C**).

317 To address whether cell wall and plasma membrane defects might be associated with one another in  
318 septin null mutants, a combinatory drug treatment approach was taken. Sublethal concentrations of CFW  
319 (2 $\mu$ g/mL) and Myriocin (10 $\mu$ g/mL), in which all strains grew at every spore concentration, were  
320 combined (**Fig 6D**). When combined, the two drugs resulted in additive, colony-level growth defects for  
321  $\Delta aspA^{cdc11}$ ,  $\Delta aspB^{cdc3}$ , and  $\Delta aspC^{cdc12}$ . This sensitivity to both drugs in combination was remediated by  
322 the addition of exogenous PHS. Surprisingly the addition of exogenous sorbitol, which had fully  
323 remediated the hypersensitivity of the septin null mutants to all previously tested cell wall-disturbing  
324 agents, resulted in a more dramatic growth defect in media containing only Myriocin, or in combination  
325 with CFW (**Fig 6C and D**). These data together suggest that the core hexamer septins AspA<sup>Cdc11</sup>,  
326 AspB<sup>Cdc3</sup>, and AspC<sup>Cdc12</sup> may monitor sphingolipid metabolism. They further suggest that the hexamer  
327 septins may signal sphingolipid status to the cell wall integrity pathway, and that this signal is required  
328 for proper cell wall integrity function.



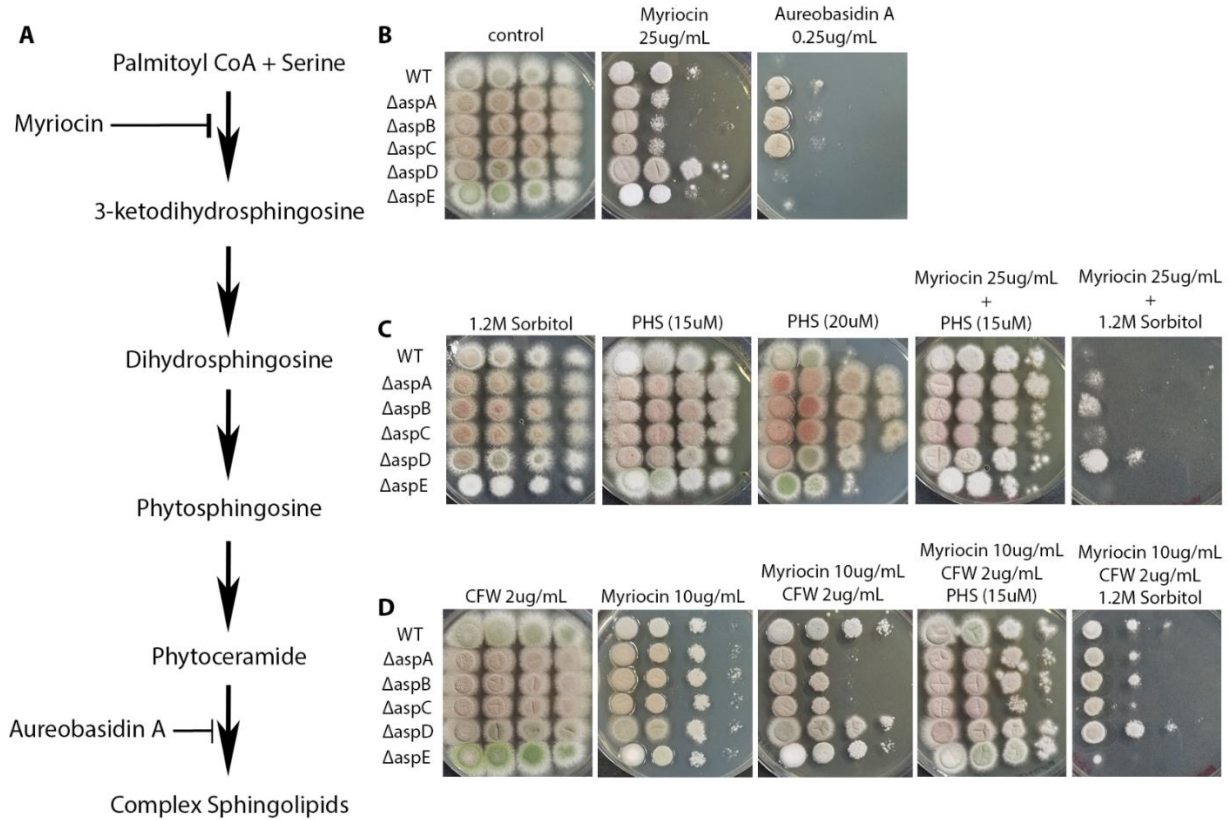

329

330

331 **Fig 6. Septin null mutants  $\Delta aspA^{cdc11}$ ,  $\Delta aspB^{cdc3}$ , and  $\Delta aspC^{cdc12}$  show altered sensitivity to agents**  
 332 **which disrupt sphingolipid biosynthesis.** (A) A simplified diagram of the sphingolipid biosynthesis  
 333 pathway in *A. nidulans* (87). Myriocin and Aureobasidin A inhibit the conversion of palmitoyl-coA and  
 334 serine to 3-ketodihydrosphingosine and the conversion of phytoceramide to the complex sphingolipid  
 335 inositolphosphorylceramide (IPC), respectively. (B) *Solid media spotting assay*. WT and septin null  
 336 mutants,  $\Delta aspA^{cdc11}$ ,  $\Delta aspB^{cdc3}$ ,  $\Delta aspC^{cdc12}$ ,  $\Delta aspD^{cdc10}$ , and  $\Delta aspE$  were tested for sensitivity by spotting  
 337 decreasing spore concentrations on solid media with or without sphingolipid biosynthesis-disturbing  
 338 agents Myriocin and Aureobasidin A. (C) *Remediation of sensitivity to sphingolipid biosynthesis-*  
 339 *disturbing agents*. WT and septin null mutants were tested for remediation of sensitivity to sphingolipid  
 340 biosynthesis-disturbing agents by spotting decreasing spore concentrations on solid media amended with  
 341 exogenous phytosphingosine (PHS) intermediate (15 $\mu$ M) or 1.2M sorbitol, with or without Myriocin. (D)  
 342 *Combinatory treatment with cell wall and sphingolipid biosynthesis-disturbing agents*. WT and septin  
 343 null mutants were tested for sensitivity to cell wall and sphingolipid biosynthesis-disturbing agents in  
 344 combination, by spotting decreasing spore concentrations on solid media with or without ‘sub-lethal’  
 345 concentrations of Calcofluor White (CFW), Myriocin, or CFW + Myriocin, amended with either  
 346 exogenous phytosphingosine intermediate (15 $\mu$ M) or 1.2M sorbitol. Differences in colony color result  
 347 from changes in spore production, spore pigment, and production of secondary metabolites under stress.  
 348 Spore concentrations were [10<sup>7</sup> conidia/mL – 10<sup>4</sup> conidia/mL] for all assays in figure. N=3

349

350 ***Septin localization is disrupted by sphingolipid inhibitors, but not by treatments which affect sterol and***  
351 ***phosphoinositide metabolism.*** We predicted that since septin null mutants,  $\Delta aspA^{cdc11}$ ,  $\Delta aspB^{cdc3}$ , and  
352  $\Delta aspC^{cdc12}$  were sensitive to drugs which inhibit sphingolipid biosynthesis the localization of these  
353 septins might be altered when exposed to the same treatments. We examined whether disruption of  
354 sphingolipid biosynthesis causes changes in septin localization using live-cell imaging with fluorescence  
355 microscopy. A strain carrying AspA-GFP was grown in liquid complete medium overnight, treated with  
356 exogenous PHS (15 $\mu$ M), and imaged for 3 hours post-treatment. There was a dynamic shift in septin  
357 localization under PHS treatment over the course of the experiment, compared to the vehicle control. The  
358 septin-GFP signal shifted from a relatively homogenous cortical localization along the hyphal tips to a  
359 more stochastic, punctate localization along the entire length of hyphae (**Fig 7, middle panel**).

360 In contrast to these results, treatments with the ergosterol-binding polyene, Filipin III (25 $\mu$ g/mL) and  
361 phosphatidylinositol 3-kinase inhibitor, Wortmannin (20 $\mu$ g/mL), did not affect the localization pattern of  
362 septins as dramatically as the PHS treatment (**Fig 7, left- and right-most panels**). Similar patterns of  
363 aberrant localization were observed under PHS treatments with septin AspB-GFP (**S3 Fig**). Myriocin  
364 treatment also resulted in a similar pattern of mislocalization in AspA-GFP cells when compared to  
365 treatment with PHS (**S4 Fig**). These results suggest sphingolipid content and/or distribution within the  
366 plasma membrane contributes to the localization and stability of core septins at the plasma membrane and  
367 that sterols and phosphoinositides may not be as vital for this process.

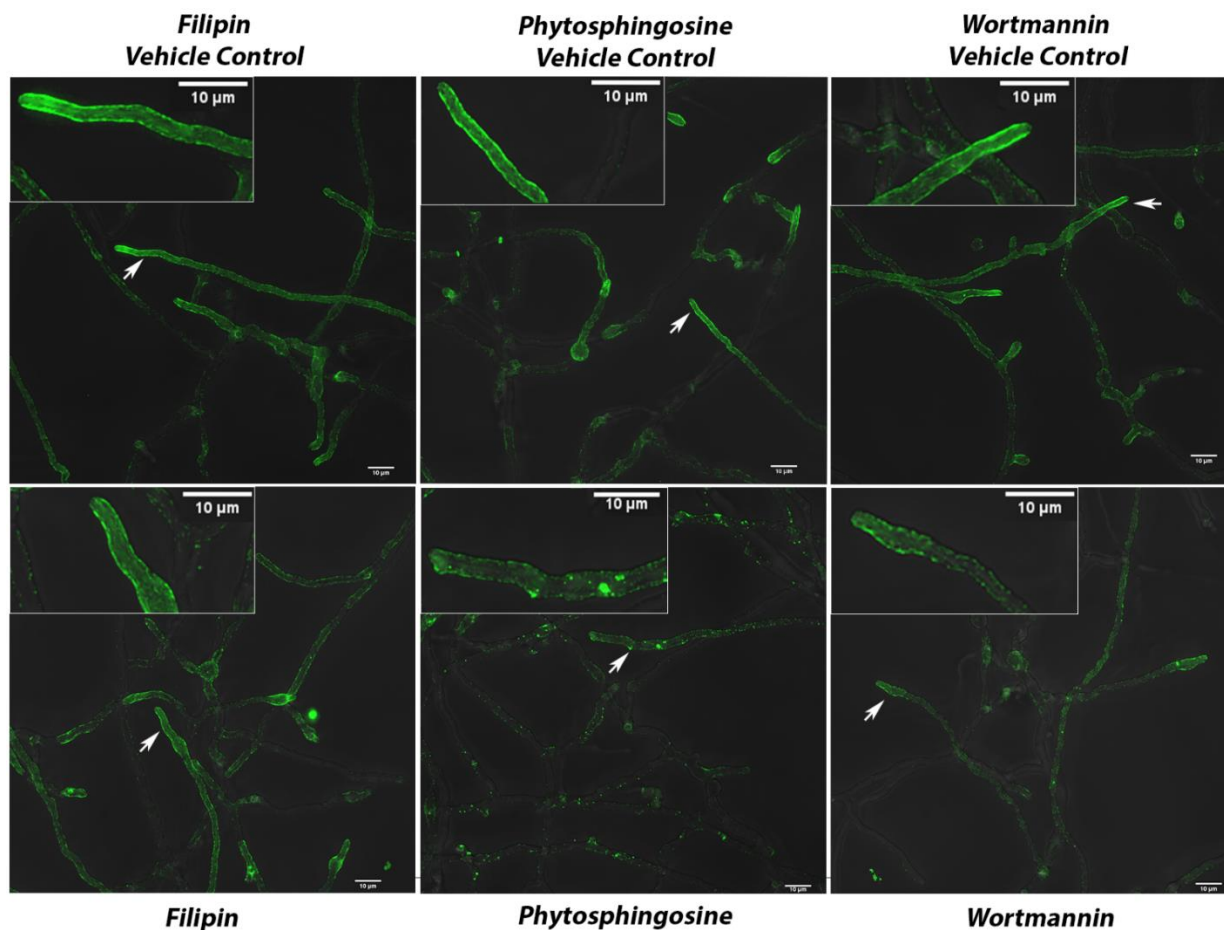

368

369

370 **Fig 7. Septin AspA-GFP localization disrupted by sphingolipid biosynthesis inhibitors.** AspA-GFP  
371 strain incubated in liquid media for approximately 16h and imaged 180 minutes after replacing with fresh  
372 media containing sterol, sphingolipid, and phosphoinositide-disturbing agents, Filipin, phytosphingosine,  
373 and Wortmannin, respectively. Representative images are shown from three independent biological  
374 replicates with  $\geq 100$  cells observed. (Top Row) Vehicle controls for each treatment. (Bottom Row)  
375 Filipin (25 $\mu\text{g}/\text{mL}$ ), phytosphingosine (15 $\mu\text{M}$ ), and Wortmannin (20 $\mu\text{g}/\text{mL}$ ) treatments respectively.  
376 Insets show enlarged section of micrographs from each picture to better visualize pattern of fluorescence  
377 signal. Imaging conducted with Deltavision I deconvolution inverted fluorescence microscope. White  
378 arrows denote hyphae which are highlighted in enlarged images. Scale bars = 10 $\mu\text{m}$ . N=3

379

## 380 Discussion

381 Our data show that *A. nidulans* septins play roles in both plasma membrane and cell wall integrity and  
382 that distinct subgroups of septins carry out these roles, with all five septins involved in membrane

383 organization and core septins (AspA<sup>Cdc11</sup>, AspB<sup>Cdc3</sup>, AspC<sup>Cdc12</sup>, and AspD<sup>Cdc10</sup>) involved in cell wall  
384 integrity. As shown in Figure 8 and discussed in more detail below, our data are consistent with a model  
385 in which: (A) Septins assemble at sites of membrane and cell wall remodeling in a sphingolipid-  
386 dependent process; (B) Septins recruit and/or scaffold lipids and associated sensors at these sites,  
387 triggering changes in lipid metabolism; and (C) Core septins recruit and/or scaffold cell wall integrity  
388 machinery to the proper locations and trigger changes in cell wall synthesis.

389 ***Septins assemble at sites of membrane and cell wall remodeling in a sphingolipid-dependent process.***

390 We hypothesize that sterol rich domain-associated lipids (ergosterol, sphingolipids, and  
391 phosphoinositides) recruit or facilitate binding and assembly of septins on the membrane, with  
392 sphingolipids contributing more to the stabilization of septins than other SRD-associated lipids in *A.*  
393 *nidulans* (**Fig 8A**). Previous studies showed preferential *in vitro* binding of yeast core septin orthologues  
394 to the phosphoinositides PIP2, PI(4,5)P2, PI(5)P, and PI(4)P, however our treatments with Wortmannin  
395 and Filipin III, known disruptors of phosphoinositides and ergosterol respectively (88-92), did not affect  
396 septin localization as dramatically as sphingolipid-disturbing treatments (**Fig 7,S3, and S4 Fig**). The  
397 marked septin mislocalization we observed upon treatment with phytosphingosine and Myriocin strongly  
398 supports the idea that sphingolipids at the membrane contribute to core septin localization and help  
399 maintain septin assemblies at the proper locations. Previous studies on composition of lipid  
400 microdomains showed that relatively minor differences in sphingolipid structure can have significant  
401 effects on sterol and phospholipid interactions, consequently resulting in major changes in membrane  
402 properties (93, 94). Perhaps sphingolipids (and ergosterol to a lesser extent) help to stabilize SRDs in a  
403 way that facilitates assembly of septin filaments and higher order structures via diffusion, collision, and  
404 annealing as proposed by Bridges et al (2014) (41-43, 95). Consistent with this idea, *A. nidulans* AspB  
405 filaments have been shown to move along the plasma membrane, break apart, and ‘snap’ together in a  
406 way that suggests collision and annealing (21).

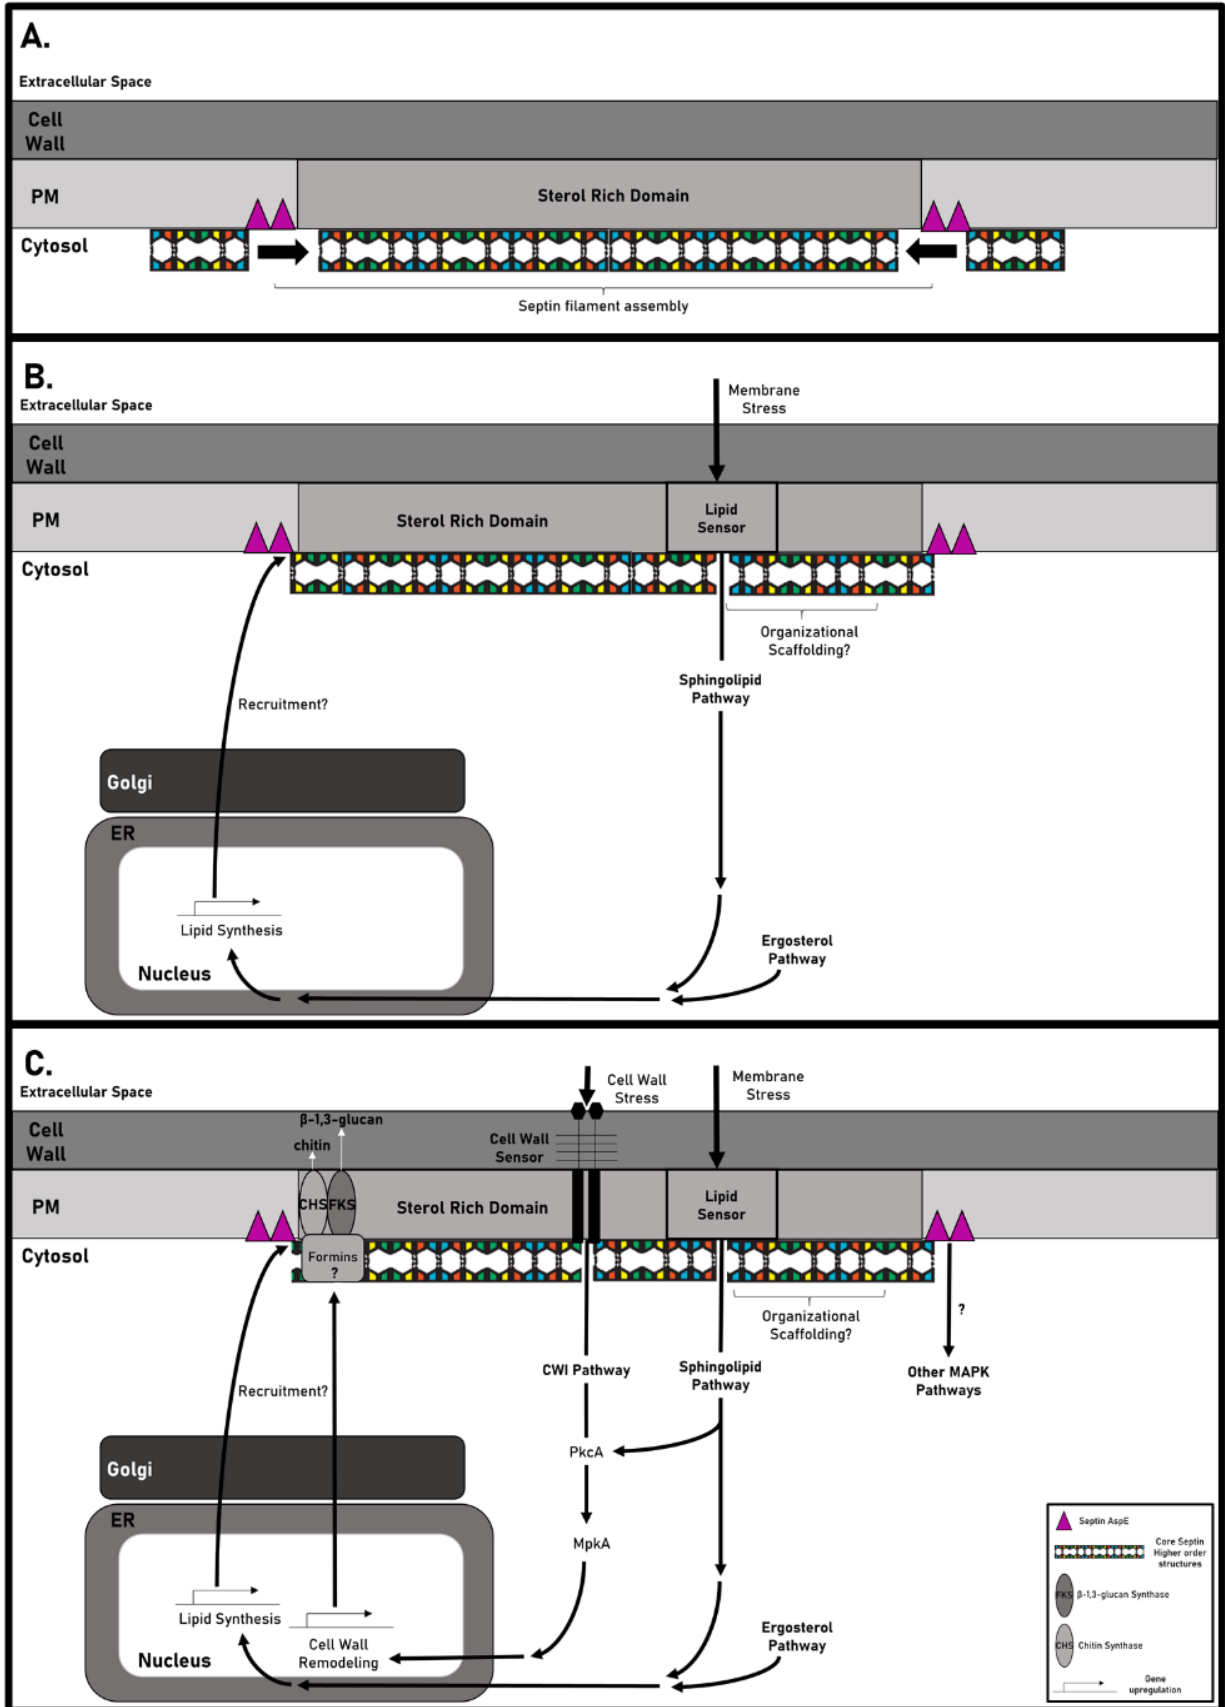

408 **Figure 8. Model for septin modulation of cell wall and plasma membrane integrity through**  
409 **interactions with sterol rich domains.** In this model, septins are proposed to colocalize with sterol rich  
410 domains in a manner which promotes: (A) assembly of septin oligomers into higher order structures along  
411 the membrane at sites of polarized growth or cell wall/PM remodeling; (B) the recruitment and/or  
412 scaffolding of lipids and associated membrane-bound sensors to monitor membrane composition and/or  
413 stress. The status of membrane composition is relayed to the nucleus where it triggers changes in  
414 expression of genes responsible for lipid metabolism; and (C) the recruitment and/or scaffolding of cell  
415 wall integrity pathway machinery to monitor cell wall composition and stress followed by the recruitment  
416 and/or scaffolding of cell wall synthases, possibly with the help of other septin-interacting proteins such  
417 as formins. Question marks (?) denote speculative processes or interactions which have not been  
418 characterized.  
419

420 *Septins recruit and/or scaffold lipids and associated sensors, triggering changes in lipid metabolism.*

421 Consistent with a role for septins in modulating membrane composition, all septin null mutants were  
422 resistant to ergosterol biosynthesis-inhibiting treatments and core hexamer septin mutants were affected  
423 by disruption of sphingolipid biosynthesis (**Fig 5A-B, Fig 6**). Based on proposed mechanisms for septins  
424 as diffusion barriers or organizational scaffolds of membrane-associated proteins in yeast and smut fungi,  
425 we propose septins monitor lipid microdomain composition and/or organization in filamentous  
426 ascomycetes (49, 51)(**Fig 8B**). Septins do not have a transmembrane domain, a feature that often defines  
427 established membrane ‘sensors’ that monitor local lipid environments (96, 97); however, septins share a  
428 highly conserved polybasic domain proposed to facilitate septin-membrane interactions (44, 98). In  
429 addition to the polybasic domain, septins have recently been shown to contain an amphipathic helix motif  
430 which has been implicated in septin sensing of membrane curvatures (99). Given that septins have been  
431 shown to assemble into non-polar higher order structures along the plasma membrane (95), septin  
432 assembly itself might be the mechanism by which lipid composition and protein organization is  
433 monitored at the cytosolic face of membranes. Perhaps septin assemblies that pass specific size or  
434 geometric thresholds trigger signaling through MAPK and other pathways.

435 *Core septins recruit and/or scaffold cell wall integrity machinery to the proper locations and trigger*

436 *changes in cell wall synthesis.* In addition to monitoring and relaying information about the membrane,

437 septins clearly have a role in normal cell wall growth and remediation of cell wall stress via the cell wall  
438 integrity pathway. We propose a major role of the core septins is to recruit and/or organize integral  
439 proteins to sites of polarized growth or remodeling at the cell cortex to ensure cell wall integrity pathway  
440 functions are carried out (**Fig 8C**). The hypersensitivity to cell wall-disturbing agents, altered cell wall  
441 composition, and altered polysaccharide deposition in the core septin null mutants (**Fig 1-2** and **S1 Fig**)  
442 are consistent with phenotypes of cell wall integrity pathway mutants in previous studies (100-102). Our  
443 glycosyl linkage analysis showed that cell wall chitin content is increased in the septin mutants compared  
444 to WT (**S1 Fig**). Hyper-synthesis of chitin has been shown to occur during cell wall stress via the cell  
445 wall integrity pathway in *S. cerevisiae* and *Candida albicans* (103-110). Double mutant analyses between  
446 septins and CWI pathway kinases also support a role for core septins in maintaining cell wall integrity  
447 under stress (**Fig 4**). These data together suggest that septins modulate cell wall integrity through the  
448 CWI MAPK pathway, functioning downstream of *mpkA*<sup>SLT2</sup>. This interpretation is consistent with studies  
449 in yeast showing Bni4 (ANID\_00979), a formin which is phosphorylated by and functions downstream of  
450 MAPK *Slr2*<sup>mpkA</sup>, directly interacts with the core septin orthologues in order to recruit chitin synthases to  
451 the bud neck (111-113). Though AspE does not appear to be directly involved in the cell wall integrity  
452 pathway, sensitivity to TOR and cAMP-PKA pathway inhibitors suggests that it might participate  
453 indirectly through MAPK pathway cross-talk (**Fig S2**).

454 Though we have discussed membrane and cell wall integrity separately, it is possible that that membrane  
455 defects in the septin null mutants contribute to the observed cell wall changes or that cell wall defects  
456 contribute to the observed changes in lipid metabolism. When septin deletion mutants were challenged  
457 with both membrane-disturbing and cell wall-disturbing agents in combination, remediation of the lipid  
458 defect (via PHS) restored proper growth, but remediation of the cell wall defect (via sorbitol) did not  
459 remediate lethality (**Fig 6C-D**). This suggests that there is a synergistic effect of disrupting sphingolipid  
460 metabolism and cell wall architecture in septin null mutants and that septin-sphingolipid interactions are  
461 required for downstream roles in maintaining cell wall integrity.

462 Because *A. nidulans* septin deletion mutants are viable, we were able to systematically analyze the roles  
463 of all septins in this organism. Our data clearly show that all septins are required for proper coordination  
464 of lipid metabolism, that the core septins are required for the cell wall integrity pathway and that these  
465 roles require sphingolipids. Based on our data we propose that septins are critical for tight coordination  
466 of plasma membrane metabolism and cell wall synthesis during normal development and response to  
467 exogenous stress.

468

469

## 470 **Methods**

### 471 *Spore Dilution Drug Sensitivity Assays*

472 Strains used in this study are listed in **S1 Table**. Media used were previously described (114).  
473 *Aspergillus nidulans* strains were harvested in ddH<sub>2</sub>O, spores normalized to  $1 \times 10^7$  or  $1 \times 10^6$   
474 conidia/mL, and then serial diluted 4-fold into separate Eppendorf tubes. All strains were inoculated in  
475 10 $\mu$ L droplets in a grid pattern on petri plates containing 25mL of solid (1.8% agar) complete medium  
476 (CM) (1% glucose, 0.2% peptone, 0.1% Casamino Acids, 0.1% yeast extract, trace elements, nitrate salts,  
477 and 0.01% vitamins, pH 6.5; with amino acid supplements as noted) or minimal medium (MM)(1%  
478 glucose, trace elements, 1% thiamine, 0.05% biotin, pH 6.5; with amino acid supplements as noted) with  
479 or without amended supplements. All incubations were conducted at 30°C as indicated for 3-4 days  
480 before images were taken. Sorbitol, NaCl, and KCl were added at 2M, 1M, and 1.5M respectively to  
481 media before autoclaving. Stock solutions were prepared as follows: Blankophor BBH/Calcofluor White  
482 (Bayer Corporation; standard-SV-2460; 25mg/mL in ddH<sub>2</sub>O and adjusted pH with 1M KOH until  
483 solubilized), Congo Red (Fisher Scientific; Lot No.8232-6; 10mg/mL in ddH<sub>2</sub>O), Caspofungin acetate  
484 (1mg/mL in ddH<sub>2</sub>O), Fludioxonil/Pestanal (2mg/mL in DMSO), and caffeine monohydrate (63.66mg/mL  
485 in ddH<sub>2</sub>O and gently heated with stirring until solubilized); calcium chloride (2M in ddH<sub>2</sub>O), EGTA



486 (0.5M in ddH<sub>2</sub>O), Rapamycin/Sirolimus (1mg/mL in acetonitrile), FK-506 (5mg/mL in DMSO),  
487 Natamycin (1.5mg/mL in MeOH), Itraconazole (10mg/mL in DMSO), Terbinafine (10mg/mL in DMSO).  
488 Stock solutions of Myriocin (5mg/mL), phytosphingosine (1mg/mL), and Aureobasidin A (1mg/mL)  
489 were prepared in DMSO, EtOH, and MeOH respectively and stored at -20C in the dark. Images of plates  
490 were captured using a cellular device with an 8.0 Megapixel camera, and subsequently processed using  
491 Photoshop CS5 Version 12.0 X32.

#### 492 *Generating double mutants and other strains by crossing*

493 Parental strains were coinoculated in CM liquid at 1X10<sup>5</sup> conidia/mL supplemented with all parental  
494 auxotrophic markers and allowed to incubate at 30°C for up to one week or until a thick mycelial mat had  
495 formed. Mycelial mats were transferred to solid MM plates containing only shared auxotrophic markers  
496 from the genetic backgrounds of each parental strain. Plates containing mycelial mats were parafilm  
497 and incubated in the dark at room temperature for up to 2 weeks or until mature cleistothecia form on the  
498 mycelial mats. Multiple cleistothecia from each genetic cross were collected in water, diluted, and plated  
499 onto solid media containing all auxotrophic supplements from each parental strain to allow growth of all  
500 resulting progeny. Approximately 50 progenies were collected from each dissected cleistothecium, and  
501 each colony was transferred to master plates, and replica-plated onto minimal media without any  
502 supplements, in order to isolate prototrophic progeny. Five to ten progenies from each cross were then 3-  
503 phased streaked to obtain single colony isolates for PCR verification. All progenies of genetic crosses  
504 were verified by diagnostic PCR using KOD XTREME Hot Start DNA Polymerase (71975-3, EMD  
505 Millipore) or OneTaq® Hot Start Quick-Load® 2X Master Mix with Standard Buffer (M0488L, New  
506 England BioLabs inc.) according to manufacturer's instructions. Double mutant strains of *ΔmpkA<sup>st2</sup>* were  
507 verified for deletion of *mpkA<sup>st2</sup>* by amplification of entire gene using primers, MpkA-806-F' and MpkA-  
508 3779-R', followed by SacI HF restriction enzyme digestion of PCR product to better visualize band sizes.  
509 All progeny from chitin synthase and septin null mutant crosses were determined to be virtually identical  
510 to each septin mutant parental strain in growth/morphology on a colony level and by microscopy, PCR-

511 verified for the deletion of each septin gene, and screened visually by fluorescence microscopy for the  
512 presence of chitin synthase-GFP signal. Chitin synthase-GFP strains in a  $\Delta aspA^{cdc11}$  genetic background  
513 were verified for deletion of  $aspA^{cdc11}$  by amplification of the entire gene using primers, AspA-KO-F' and  
514 AspA-KO-R', followed by XhoI restriction enzyme digestion for verification of band sizes. Strains and  
515 primer sets used in this study can be found in S1 and S2 Tables respectively.

#### 516 *Growth conditions and microscopy*

517 Growth and preparation of cells were as previously reported (115). Conidia were inoculated on sterile  
518 coverslips in 10mL liquid complete or minimal media at  $1 \times 10^5$  conidia/mL and incubated at 30C in a small  
519 petri dish for the specified amount of time. Cell walls were stained for chitin with Blankophor BBH (CFW)  
520 (American Cyanamid, Wayne, NJ; 25mg/mL stock solution in ddH<sub>2</sub>O and pH adjusted by 1M KOH until  
521 solubilized; working solution made by diluting stock solution by 100X and 8ul dissolved in 5mL ddH<sub>2</sub>O  
522 prepared fresh for working solution and used immediately),  $\beta$ -(1,3)-glucans were stained with aniline blue  
523 (stock solution prepared fresh to 10 mg/mL final concentration in ddH<sub>2</sub>O; working solution prepared at  
524 135.55 $\mu$ M in 50mM phosphate buffer, pH adjusted to 9.5 with 5M KOH, and used immediately; coverslips  
525 stained for 5 minutes in the dark at RT). Live cell imaging experiments tracking septin localization were  
526 conducted using Filipin III (stock solution prepared at 5mg/mL in DMSO; working solution was used at  
527 25 $\mu$ g/mL final concentration in liquid complete media), phytosphingosine (working solution was used at  
528 15 $\mu$ M in liquid complete media), and Wortmannin (stock solution prepared to 2mg/mL in DMSO; working  
529 solution was used at 20ug/mL in liquid complete media). Vehicle controls and conducted at  $\leq 1\%$  w/v in  
530 liquid media. Imaging was performed in the Biomedical Microscopy Core at the University of Georgia.

531 Microscopy was carried out using Zeiss Axioplan microscope and Zeiss Axiocam MRc charge-coupled  
532 device camera and software, as well as Deltavision I Deconvolution Inverted Microscope and LSM880  
533 Confocal Fluorescent microscope with Diode laser (405nm), Argon (458, 488, 514nm) and HeNe (543,  
534 633nm) laser lines. All micrograph comparisons between treatments imaged with identical microscope

535 settings. Subsequent image analysis and scale bars added to micrographs, using ImageJ software 1.48v,  
536 Java 1.6.0\_20 (64-bit) or Zen 2.3 imaging software, and final figures compiled in Photoshop CS5  
537 software version 12.0 x32.

#### 538 *Cell Wall Extraction*

539 A single batch of complete media (recipe described above) was autoclaved and supplements added:  
540 Arginine, Methionine, Pyridoxine, and Riboflavin, were added to single flask and then distributed to  
541 individual flasks to be inoculated.  $1 \times 10^4$  conidia/mL were inoculated in 2 flasks each of 100mL liquid  
542 Complete Media. Flasks were incubated at 30C in orbital shaker at 200rpm for 48 hours. Mycelia was  
543 gravity filtrated, then vacuum-filtrated through #42 Whatman filter paper, subsequently washed with  
544 50mL each of chilled ddH2O to remove residual media and stored at -80C until completely frozen.  
545 Mycelium from each sample was allowed to thaw on ice and then washed sequentially with 50mL chilled  
546 ddH2O and 0.5M NaCl. Fungal hyphal mats were transferred to mortar and pestle, then subsequently  
547 flash frozen in liquid nitrogen and ground in chilled Tris/EDTA Disruption Buffer (DB; 20mM Tris,  
548 50mM EDTA, pH 8.0) with pre-chilled mortar and pestle. Samples were monitored by microscopy under  
549 60X or 100X objective until hyphal ghosts were evident. Cell walls were separated by centrifugation at  
550 13,800g for 10 min at 4C. Cell Pellet was placed in a beaker with 40-100mL of chilled Tris/EDTA buffer  
551 and stirred at 4C for 12 hours. Cell pellet was collected by centrifugation as above and stirred again with  
552 100mL chilled ddH2O at 4C for 4 hours. Cell wall materials was collected by vacuum filtration, frozen at  
553 -80C, lyophilized to dryness, and stored at room temperature (25°C) for further analysis.

#### 554 *Cell Wall Glycosyl Linkage Analysis*

555 To determine the glycosyl linkages, the samples were acetylated using pyridine and acetic anhydride in  
556 order to get better solubility, before two rounds of permethylation using sodium hydroxide (15 min) and  
557 methyl iodide (45 min). The permethylated material was hydrolyzed using 2M TFA (2 h in sealed tube at  
558 121°C), reduced with NaBD<sub>4</sub>, and acetylated using acetic anhydride/pyridine. The resulting PMAAs

559 (Neutral sugars) were analyzed on an Agilent 7890A GC interfaced to a 5975C MSD (mass selective  
560 detector, electron impact ionization mode); separation was performed on a 30 m Supelco SP-2331 bonded  
561 phase fused silica capillary column using Supelco SP-2331 fused silica capillary column (30 m x 0,25 mm  
562 ID). The PMAAs of amino sugars were separated on Supelco Equity-1 column (30 m x 0.25 mm ID).  
563 Further, the relative quantities of respective glycosyl linkages were calculated by integrating the peak area  
564 of respective peak. Since the neutral and amino sugars were analyzed on different instruments, the peak  
565 area of amino sugars was normalized with 4-Glc peak, which is prominent in both the instruments and the  
566 integrated and normalized peak areas were pooled together to calculate the relative percentage of individual  
567 linkages. Two independent, biological replicates were conducted for this analysis and processed in tandem.  
568 The average area (%) of detected linkages of one representative data set is included in the graphs to show  
569 relative differences between cell wall polysaccharides between samples.

570

## 571 **Acknowledgements**

572 These studies were supported by the University of Georgia Franklin College of Arts and Sciences support  
573 to MM and Plant Biology Department support to AM. Chitin synthase strains were generously provided  
574 by Dr. Hiroyuki Horiuchi in the Department of Biotechnology at the University of Tokyo. The glycosyl  
575 linkage analysis was supported by a Chemical Sciences, Geosciences and Biosciences Division, Office of  
576 Basic Energy Sciences, U.S. Department of Energy grant (DE-SC0015662) to Parastoo Azadi at the  
577 Complex Carbohydrate Research Center at UGA.

578

579

580 **References**

- 581 1. Shaw JA, Mol PC, Bowers B, Silverman SJ, Valdivieso MH, Duran A, et al. The function of  
582 chitin synthases 2 and 3 in the *Saccharomyces cerevisiae* cell cycle. *J Cell Biol.* 1991;114(1):111-23.
- 583 2. Bulawa CE, Miller DW, Henry LK, Becker JM. Attenuated virulence of chitin-deficient mutants  
584 of *Candida albicans*. *Proc Natl Acad Sci U S A.* 1995;92(23):10570-4.
- 585 3. Sudoh M, Yamazaki T, Masubuchi K, Taniguchi M, Shimma N, Arisawa M, et al. Identification  
586 of a novel inhibitor specific to the fungal chitin synthase. Inhibition of chitin synthase 1 arrests the cell  
587 growth, but inhibition of chitin synthase 1 and 2 is lethal in the pathogenic fungus *Candida albicans*. *J*  
588 *Biol Chem.* 2000;275(42):32901-5.
- 589 4. Munro CA, Gow NA. Chitin synthesis in human pathogenic fungi. *Med Mycol.* 2001;39 Suppl  
590 1:41-53.
- 591 5. Schmidt M. Survival and cytokinesis of *Saccharomyces cerevisiae* in the absence of chitin.  
592 *Microbiology.* 2004;150(Pt 10):3253-60.
- 593 6. Orlean P. Architecture and biosynthesis of the *Saccharomyces cerevisiae* cell wall. *Genetics.*  
594 2012;192(3):775-818.
- 595 7. Gladfelter AS, Pringle JR, Lew DJ. The septin cortex at the yeast mother-bud neck. *Curr Opin*  
596 *Microbiol.* 2001;4(6):681-9.
- 597 8. Longtine MS, Bi E. Regulation of septin organization and function in yeast. *Trends Cell Biol.*  
598 2003;13(8):403-9.
- 599 9. Caudron F, Barral Y. Septins and the lateral compartmentalization of eukaryotic membranes. *Dev*  
600 *Cell.* 2009;16(4):493-506.

- 601 10. Takizawa PA, DeRisi JL, Wilhelm JE, Vale RD. Plasma membrane compartmentalization in  
602 yeast by messenger RNA transport and a septin diffusion barrier. *Science*. 2000;290(5490):341-4.
- 603 11. Dobbelaere J, Barral Y. Spatial coordination of cytokinetic events by compartmentalization of the  
604 cell cortex. *Science*. 2004;305(5682):393-6.
- 605 12. Oh Y, Bi E. Septin structure and function in yeast and beyond. *Trends Cell Biol*. 2011;21(3):141-  
606 8.
- 607 13. Glomb O, Gronemeyer T. Septin Organization and Functions in Budding Yeast. *Front Cell Dev*  
608 *Biol*. 2016;4:123.
- 609 14. Trimble WS, Grinstein S. Barriers to the free diffusion of proteins and lipids in the plasma  
610 membrane. *J Cell Biol*. 2015;208(3):259-71.
- 611 15. McMurray MA, Bertin A, Garcia G, 3rd, Lam L, Nogales E, Thorner J. Septin filament formation  
612 is essential in budding yeast. *Dev Cell*. 2011;20(4):540-9.
- 613 16. Sirajuddin M, Farkasovsky M, Hauer F, Kuhlmann D, Macara IG, Weyand M, et al. Structural  
614 insight into filament formation by mammalian septins. *Nature*. 2007;449(7160):311-5.
- 615 17. Bertin A, McMurray MA, Grob P, Park SS, Garcia G, 3rd, Patanwala I, et al. *Saccharomyces*  
616 *cerevisiae* septins: supramolecular organization of heterooligomers and the mechanism of filament  
617 assembly. *Proc Natl Acad Sci U S A*. 2008;105(24):8274-9.
- 618 18. McMurray MA, Thorner J. Turning it inside out: the organization of human septin hetero-  
619 oligomers. *Cytoskeleton (Hoboken)*. 2019.
- 620 19. Pan F, Malmberg RL, Momany M. Analysis of septins across kingdoms reveals orthology and  
621 new motifs. *BMC Evol Biol*. 2007;7:103.

- 622 20. Hernandez-Rodriguez Y, Masuo S, Johnson D, Orlando R, Smith A, Couto-Rodriguez M, et al.  
623 Distinct septin heteropolymers co-exist during multicellular development in the filamentous fungus  
624 *Aspergillus nidulans*. PLoS One. 2014;9(3):e92819.
- 625 21. Hernandez-Rodriguez Y, Hastings S, Momany M. The septin AspB in *Aspergillus nidulans* forms  
626 bars and filaments and plays roles in growth emergence and conidiation. Eukaryot Cell. 2012;11(3):311-  
627 23.
- 628 22. Fukuda K, Yamada K, Deoka K, Yamashita S, Ohta A, Horiuchi H. Class III chitin synthase  
629 ChsB of *Aspergillus nidulans* localizes at the sites of polarized cell wall synthesis and is required for  
630 conidial development. Eukaryot Cell. 2009;8(7):945-56.
- 631 23. Blankenship JR, Fanning S, Hamaker JJ, Mitchell AP. An extensive circuitry for cell wall  
632 regulation in *Candida albicans*. PLoS Pathog. 2010;6(2):e1000752.
- 633 24. Mostowy S, Cossart P. Septins: the fourth component of the cytoskeleton. Nat Rev Mol Cell Biol.  
634 2012;13(3):183-94.
- 635 25. Wiederhold NP, Kontoyiannis DP, Prince RA, Lewis RE. Attenuation of the activity of  
636 caspofungin at high concentrations against *Candida albicans*: possible role of cell wall integrity and  
637 calcineurin pathways. Antimicrob Agents Chemother. 2005;49(12):5146-8.
- 638 26. Munro CA, Selvagghini S, de Bruijn I, Walker L, Lenardon MD, Gerssen B, et al. The PKC, HOG  
639 and Ca<sup>2+</sup> signalling pathways co-ordinately regulate chitin synthesis in *Candida albicans*. Mol Microbiol.  
640 2007;63(5):1399-413.
- 641 27. Fujioka A, Terai K, Itoh RE, Aoki K, Nakamura T, Kuroda S, et al. Dynamics of the Ras/ERK  
642 MAPK cascade as monitored by fluorescent probes. J Biol Chem. 2006;281(13):8917-26.

- 643 28. Walker LA, Munro CA, de Bruijn I, Lenardon MD, McKinnon A, Gow NA. Stimulation of chitin  
644 synthesis rescues *Candida albicans* from echinocandins. *PLoS Pathog.* 2008;4(4):e1000040.
- 645 29. Rodriguez-Pena JM, Garcia R, Nombela C, Arroyo J. The high-osmolarity glycerol (HOG) and  
646 cell wall integrity (CWI) signalling pathways interplay: a yeast dialogue between MAPK routes. *Yeast.*  
647 2010;27(8):495-502.
- 648 30. Colabardini AC, Ries LN, Brown NA, Savoldi M, Dinamarco TM, von Zeska Kress MR, et al.  
649 Protein kinase C overexpression suppresses calcineurin-associated defects in *Aspergillus nidulans* and is  
650 involved in mitochondrial function. *PLoS One.* 2014;9(8):e104792.
- 651 31. Garcia R, Bravo E, Diez-Muniz S, Nombela C, Rodriguez-Pena JM, Arroyo J. A novel  
652 connection between the Cell Wall Integrity and the PKA pathways regulates cell wall stress response in  
653 yeast. *Sci Rep.* 2017;7(1):5703.
- 654 32. Manfiolli AO, Mattos EC, de Assis LJ, Silva LP, Ulas M, Brown NA, et al. *Aspergillus*  
655 *fumigatus* High Osmolarity Glycerol Mitogen Activated Protein Kinases SakA and MpkC Physically  
656 Interact During Osmotic and Cell Wall Stresses. *Front Microbiol.* 2019;10:918.
- 657 33. Dickson RC. Thematic review series: sphingolipids. New insights into sphingolipid metabolism  
658 and function in budding yeast. *J Lipid Res.* 2008;49(5):909-21.
- 659 34. Sims KJ, Spassieva SD, Voit EO, Obeid LM. Yeast sphingolipid metabolism: clues and  
660 connections. *Biochem Cell Biol.* 2004;82(1):45-61.
- 661 35. Roelants FM, Torrance PD, Bezman N, Thorner J. Pkh1 and Pkh2 differentially phosphorylate  
662 and activate Ypk1 and Ykr2 and define protein kinase modules required for maintenance of cell wall  
663 integrity. *Mol Biol Cell.* 2002;13(9):3005-28.



- 664 36. Weete JD, Abril M, Blackwell M. Phylogenetic distribution of fungal sterols. *PLoS One*.  
665 2010;5(5):e10899.
- 666 37. Alvarez FJ, Douglas LM, Konopka JB. Sterol-rich plasma membrane domains in fungi. *Eukaryot*  
667 *Cell*. 2007;6(5):755-63.
- 668 38. Tanaka S, Tani M. Mannosylinositol phosphorylceramides and ergosterol coordinately maintain  
669 cell wall integrity in the yeast *Saccharomyces cerevisiae*. *FEBS J*. 2018;285(13):2405-27.
- 670 39. Bagnat M, Simons K. Lipid rafts in protein sorting and cell polarity in budding yeast  
671 *Saccharomyces cerevisiae*. *Biol Chem*. 2002;383(10):1475-80.
- 672 40. van Meer G, Voelker DR, Feigenson GW. Membrane lipids: where they are and how they  
673 behave. *Nat Rev Mol Cell Biol*. 2008;9(2):112-24.
- 674 41. Tanaka-Takiguchi Y, Kinoshita M, Takiguchi K. Septin-mediated uniform bracing of  
675 phospholipid membranes. *Curr Biol*. 2009;19(2):140-5.
- 676 42. Bertin A, McMurray MA, Thai L, Garcia G, 3rd, Votin V, Grob P, et al. Phosphatidylinositol-4,5-  
677 bisphosphate promotes budding yeast septin filament assembly and organization. *J Mol Biol*.  
678 2010;404(4):711-31.
- 679 43. Krokowski S, Lobato-Marquez D, Chastanet A, Pereira PM, Angelis D, Galea D, et al. Septins  
680 Recognize and Entrap Dividing Bacterial Cells for Delivery to Lysosomes. *Cell Host Microbe*.  
681 2018;24(6):866-74 e4.
- 682 44. Zhang J, Kong C, Xie H, McPherson PS, Grinstein S, Trimble WS. Phosphatidylinositol  
683 polyphosphate binding to the mammalian septin H5 is modulated by GTP. *Curr Biol*. 1999;9(24):1458-  
684 67.

- 685 45. Costanzo M, Baryshnikova A, Bellay J, Kim Y, Spear ED, Sevier CS, et al. The genetic  
686 landscape of a cell. *Science*. 2010;327(5964):425-31.
- 687 46. Clay L, Caudron F, Denoth-Lippuner A, Boettcher B, Buvelot Frei S, Snapp EL, et al. A  
688 sphingolipid-dependent diffusion barrier confines ER stress to the yeast mother cell. *Elife*.  
689 2014;3:e01883.
- 690 47. Martin SW, Konopka JB. Lipid raft polarization contributes to hyphal growth in *Candida*  
691 *albicans*. *Eukaryot Cell*. 2004;3(3):675-84.
- 692 48. Beh CT, Alfaro G, Duamel G, Sullivan DP, Kersting MC, Dighe S, et al. Yeast oxysterol-binding  
693 proteins: sterol transporters or regulators of cell polarization? *Mol Cell Biochem*. 2009;326(1-2):9-13.
- 694 49. Canovas D, Perez-Martin J. Sphingolipid biosynthesis is required for polar growth in the  
695 dimorphic phytopathogen *Ustilago maydis*. *Fungal Genet Biol*. 2009;46(2):190-200.
- 696 50. Singh P, Ramachandran SK, Zhu J, Kim BC, Biswas D, Ha T, et al. Sphingolipids facilitate age  
697 asymmetry of membrane proteins in dividing yeast cells. *Mol Biol Cell*. 2017;28(20):2712-22.
- 698 51. Sugiyama S, Tanaka M. Distinct segregation patterns of yeast cell-peripheral proteins uncovered  
699 by a method for protein segregatome analysis. *Proc Natl Acad Sci U S A*. 2019;116(18):8909-18.
- 700 52. Bridges AA, Gladfelter AS. Septin Form and Function at the Cell Cortex. *J Biol Chem*.  
701 2015;290(28):17173-80.
- 702 53. Merlini L, Bolognesi A, Juanes MA, Vandermoere F, Courtellemont T, Pascolutti R, et al. Rho1-  
703 and Pkc1-dependent phosphorylation of the F-BAR protein Syp1 contributes to septin ring assembly. *Mol*  
704 *Biol Cell*. 2015;26(18):3245-62.

- 705 54. Badrane H, Nguyen MH, Clancy CJ. Highly Dynamic and Specific Phosphatidylinositol 4,5-  
706 Bisphosphate, Septin, and Cell Wall Integrity Pathway Responses Correlate with Caspofungin Activity  
707 against *Candida albicans*. *Antimicrob Agents Chemother*. 2016;60(6):3591-600.
- 708 55. de Almeida RFM. A route to understanding yeast cellular envelope - plasma membrane lipids  
709 interplaying in cell wall integrity. *FEBS J*. 2018;285(13):2402-4.
- 710 56. Wu JQ, Ye Y, Wang N, Pollard TD, Pringle JR. Cooperation between the septins and the  
711 actomyosin ring and role of a cell-integrity pathway during cell division in fission yeast. *Genetics*.  
712 2010;186(3):897-915.
- 713 57. Zhang Y, Gao T, Shao W, Zheng Z, Zhou M, Chen C. The septins FaCdc3 and FaCdc12 are  
714 required for cytokinesis and affect asexual and sexual development, lipid metabolism and virulence in  
715 *Fusarium asiaticum*. *Mol Plant Pathol*. 2017;18(9):1282-94.
- 716 58. Kuranda K, Leberre V, Sokol S, Palamarczyk G, Francois J. Investigating the caffeine effects in  
717 the yeast *Saccharomyces cerevisiae* brings new insights into the connection between TOR, PKC and  
718 Ras/cAMP signalling pathways. *Mol Microbiol*. 2006;61(5):1147-66.
- 719 59. Kovacs Z, Szarka M, Kovacs S, Boczonadi I, Emri T, Abe K, et al. Effect of cell wall integrity  
720 stress and RlmA transcription factor on asexual development and autolysis in *Aspergillus nidulans*.  
721 *Fungal Genet Biol*. 2013;54:1-14.
- 722 60. Roncero C, Duran A. Effect of Calcofluor white and Congo red on fungal cell wall  
723 morphogenesis: in vivo activation of chitin polymerization. *J Bacteriol*. 1985;163(3):1180-5.
- 724 61. Pancaldi S, Poli F, Dall'Olio G, Vannini GL. Morphological anomalies induced by Congo red in  
725 *Aspergillus niger*. *Arch Microbiol*. 1984;137(3):185-7.

- 726 62. Kopecka M, Gabriel M. The influence of congo red on the cell wall and (1----3)-beta-D-glucan  
727 microfibril biogenesis in *Saccharomyces cerevisiae*. *Arch Microbiol.* 1992;158(2):115-26.
- 728 63. Onishi J, Meinz M, Thompson J, Curotto J, Dreikorn S, Rosenbach M, et al. Discovery of novel  
729 antifungal (1,3)-beta-D-glucan synthase inhibitors. *Antimicrob Agents Chemother.* 2000;44(2):368-77.
- 730 64. Kojima K, Bahn YS, Heitman J. Calcineurin, Mpk1 and Hog1 MAPK pathways independently  
731 control fludioxonil antifungal sensitivity in *Cryptococcus neoformans*. *Microbiology.* 2006;152(Pt  
732 3):591-604.
- 733 65. Yun Y, Liu Z, Zhang J, Shim WB, Chen Y, Ma Z. The MAPKK FgMkk1 of *Fusarium*  
734 *graminearum* regulates vegetative differentiation, multiple stress response, and virulence via the cell wall  
735 integrity and high-osmolarity glycerol signaling pathways. *Environ Microbiol.* 2014;16(7):2023-37.
- 736 66. Dongo A, Bataille-Simoneau N, Champion C, Guillemette T, Hamon B, Iacomi-Vasilescu B, et al.  
737 The group III two-component histidine kinase of filamentous fungi is involved in the fungicidal activity  
738 of the bacterial polyketide ambruticin. *Appl Environ Microbiol.* 2009;75(1):127-34.
- 739 67. Hohmann S. Osmotic stress signaling and osmoadaptation in yeasts. *Microbiol Mol Biol Rev.*  
740 2002;66(2):300-72.
- 741 68. Garcia-Rodriguez LJ, Trilla JA, Castro C, Valdivieso MH, Duran A, Roncero C. Characterization  
742 of the chitin biosynthesis process as a compensatory mechanism in the *fks1* mutant of *Saccharomyces*  
743 *cerevisiae*. *FEBS Lett.* 2000;478(1-2):84-8.
- 744 69. Fortwendel JR, Juvvadi PR, Perfect BZ, Rogg LE, Perfect JR, Steinbach WJ. Transcriptional  
745 regulation of chitin synthases by calcineurin controls paradoxical growth of *Aspergillus fumigatus* in  
746 response to caspofungin. *Antimicrob Agents Chemother.* 2010;54(4):1555-63.
- 747 70. Pettolino FA, Walsh C, Fincher GB, Bacic A. Determining the polysaccharide composition of  
748 plant cell walls. *Nat Protoc.* 2012;7(9):1590-607.

- 749 71. Yoshimi A, Miyazawa K, Abe K. Cell wall structure and biogenesis in *Aspergillus* species.  
750 *Biosci Biotechnol Biochem.* 2016;80(9):1700-11.
- 751 72. Yoshimoto H, Saltsman K, Gasch AP, Li HX, Ogawa N, Botstein D, et al. Genome-wide analysis  
752 of gene expression regulated by the calcineurin/Crz1p signaling pathway in *Saccharomyces cerevisiae*. *J*  
753 *Biol Chem.* 2002;277(34):31079-88.
- 754 73. Sio SO, Suehiro T, Sugiura R, Takeuchi M, Mukai H, Kuno T. The role of the regulatory subunit  
755 of fission yeast calcineurin for in vivo activity and its relevance to FK506 sensitivity. *J Biol Chem.*  
756 2005;280(13):12231-8.
- 757 74. Wang S, Liu X, Qian H, Zhang S, Lu L. Calcineurin and Calcium Channel CchA Coordinate the  
758 Salt Stress Response by Regulating Cytoplasmic Ca<sup>2+</sup> Homeostasis in *Aspergillus nidulans*. *Appl*  
759 *Environ Microbiol.* 2016;82(11):3420-30.
- 760 75. Harvald EB, Olsen AS, Faergeman NJ. Autophagy in the light of sphingolipid metabolism.  
761 *Apoptosis.* 2015;20(5):658-70.
- 762 76. Barbet NC, Schneider U, Helliwell SB, Stansfield I, Tuite MF, Hall MN. TOR controls  
763 translation initiation and early G1 progression in yeast. *Mol Biol Cell.* 1996;7(1):25-42.
- 764 77. Cardenas ME, Cutler NS, Lorenz MC, Di Como CJ, Heitman J. The TOR signaling cascade  
765 regulates gene expression in response to nutrients. *Genes Dev.* 1999;13(24):3271-9.
- 766 78. Scott PH, Lawrence JC, Jr. Attenuation of mammalian target of rapamycin activity by increased  
767 cAMP in 3T3-L1 adipocytes. *J Biol Chem.* 1998;273(51):34496-501.
- 768 79. Fitzgibbon GJ, Morozov IY, Jones MG, Caddick MX. Genetic analysis of the TOR pathway in  
769 *Aspergillus nidulans*. *Eukaryot Cell.* 2005;4(9):1595-8.

- 770 80. Soulard A, Cremonesi A, Moes S, Schutz F, Jenö P, Hall MN. The rapamycin-sensitive  
771 phosphoproteome reveals that TOR controls protein kinase A toward some but not all substrates. *Mol*  
772 *Biol Cell*. 2010;21(19):3475-86.
- 773 81. Butcher FR, Potter VR. Control of the adenosine 3',5'-monophosphate-adenyl cyclase system in  
774 the livers of developing rats. *Cancer Res*. 1972;32(10):2141-7.
- 775 82. Ni M, Rierson S, Seo JA, Yu JH. The pkaB gene encoding the secondary protein kinase A  
776 catalytic subunit has a synthetic lethal interaction with pkaA and plays overlapping and opposite roles in  
777 *Aspergillus nidulans*. *Eukaryot Cell*. 2005;4(8):1465-76.
- 778 83. Binder U, Oberparleiter C, Meyer V, Marx F. The antifungal protein PAF interferes with  
779 PKC/MPK and cAMP/PKA signalling of *Aspergillus nidulans*. *Mol Microbiol*. 2010;75(2):294-307.
- 780 84. Foderaro JE, Douglas LM, Konopka JB. MCC/Eisosomes Regulate Cell Wall Synthesis and  
781 Stress Responses in Fungi. *J Fungi (Basel)*. 2017;3(4).
- 782 85. Onyewu C, Blankenship JR, Del Poeta M, Heitman J. Ergosterol biosynthesis inhibitors become  
783 fungicidal when combined with calcineurin inhibitors against *Candida albicans*, *Candida glabrata*, and  
784 *Candida krusei*. *Antimicrob Agents Chemother*. 2003;47(3):956-64.
- 785 86. Cheng J, Park TS, Fischl AS, Ye XS. Cell cycle progression and cell polarity require sphingolipid  
786 biosynthesis in *Aspergillus nidulans*. *Mol Cell Biol*. 2001;21(18):6198-209.
- 787 87. Li S, Bao D, Yuen G, Harris SD, Calvo AM. basA regulates cell wall organization and  
788 asexual/sexual sporulation ratio in *Aspergillus nidulans*. *Genetics*. 2007;176(1):243-53.
- 789 88. Walker EH, Pacold ME, Perisic O, Stephens L, Hawkins PT, Wymann MP, et al. Structural  
790 determinants of phosphoinositide 3-kinase inhibition by wortmannin, LY294002, quercetin, myricetin,  
791 and staurosporine. *Mol Cell*. 2000;6(4):909-19.

- 792 89. Wymann MP, Bulgarelli-Leva G, Zvelebil MJ, Pirola L, Vanhaesebroeck B, Waterfield MD, et  
793 al. Wortmannin inactivates phosphoinositide 3-kinase by covalent modification of Lys-802, a residue  
794 involved in the phosphate transfer reaction. *Mol Cell Biol.* 1996;16(4):1722-33.
- 795 90. Santos NC, Ter-Ovanesyan E, Zasadzinski JA, Prieto M, Castanho MA. Filipin-induced lesions  
796 in planar phospholipid bilayers imaged by atomic force microscopy. *Biophys J.* 1998;75(4):1869-73.
- 797 91. Takeo K. A correlation between mode of growth and regional ultrastructure of the plasma  
798 membrane of *Schizosaccharomyces pombe* as revealed by freeze-fracturing before and after filipin  
799 treatment. *J Gen Microbiol.* 1985;131(2):309-16.
- 800 92. de Kruijff B, Demel RA. Polyene antibiotic-sterol interactions in membranes of *Acholeplasma*  
801 *laidlawii* cells and lecithin liposomes. 3. Molecular structure of the polyene antibiotic-cholesterol  
802 complexes. *Biochim Biophys Acta.* 1974;339(1):57-70.
- 803 93. Bjorkbom A, Rog T, Kaszuba K, Kurita M, Yamaguchi S, Lonnfors M, et al. Effect of  
804 sphingomyelin headgroup size on molecular properties and interactions with cholesterol. *Biophys J.*  
805 2010;99(10):3300-8.
- 806 94. Ramstedt B, Slotte JP. Sphingolipids and the formation of sterol-enriched ordered membrane  
807 domains. *Biochim Biophys Acta.* 2006;1758(12):1945-56.
- 808 95. Bridges AA, Zhang H, Mehta SB, Occhipinti P, Tani T, Gladfelter AS. Septin assemblies form by  
809 diffusion-driven annealing on membranes. *Proc Natl Acad Sci U S A.* 2014;111(6):2146-51.
- 810 96. Cho H, Stanzione F, Oak A, Kim GH, Yerneni S, Qi L, et al. Intrinsic Structural Features of the  
811 Human IRE1alpha Transmembrane Domain Sense Membrane Lipid Saturation. *Cell Rep.*  
812 2019;27(1):307-20 e5.

- 813 97. Nyholm TK, Ozdirekcan S, Killian JA. How protein transmembrane segments sense the lipid  
814 environment. *Biochemistry*. 2007;46(6):1457-65.
- 815 98. Valadares NF, d' Muniz Pereira H, Ulian Araujo AP, Garratt RC. Septin structure and filament  
816 assembly. *Biophys Rev*. 2017;9(5):481-500.
- 817 99. Cannon KS, Woods BL, Crutchley JM, Gladfelter AS. An amphipathic helix enables septins to  
818 sense micrometer-scale membrane curvature. *J Cell Biol*. 2019;218(4):1128-37.
- 819 100. Valiante V, Macheleidt J, Foge M, Brakhage AA. The *Aspergillus fumigatus* cell wall integrity  
820 signaling pathway: drug target, compensatory pathways, and virulence. *Front Microbiol*. 2015;6:325.
- 821 101. Valiante V, Jain R, Heinekamp T, Brakhage AA. The MpkA MAP kinase module regulates cell  
822 wall integrity signaling and pyomelanin formation in *Aspergillus fumigatus*. *Fungal Genet Biol*.  
823 2009;46(12):909-18.
- 824 102. Valiante V, Heinekamp T, Jain R, Hartl A, Brakhage AA. The mitogen-activated protein kinase  
825 MpkA of *Aspergillus fumigatus* regulates cell wall signaling and oxidative stress response. *Fungal Genet*  
826 *Biol*. 2008;45(5):618-27.
- 827 103. Ram AF, Wolters A, Ten Hoopen R, Klis FM. A new approach for isolating cell wall mutants in  
828 *Saccharomyces cerevisiae* by screening for hypersensitivity to calcofluor white. *Yeast*. 1994;10(8):1019-  
829 30.
- 830 104. Ram AF, Kapteyn JC, Montijn RC, Caro LH, Douwes JE, Baginsky W, et al. Loss of the plasma  
831 membrane-bound protein Gas1p in *Saccharomyces cerevisiae* results in the release of beta1,3-glucan into  
832 the medium and induces a compensation mechanism to ensure cell wall integrity. *J Bacteriol*.  
833 1998;180(6):1418-24.



- 834 105. Kapteyn JC, Ram AF, Groos EM, Kollar R, Montijn RC, Van Den Ende H, et al. Altered extent  
835 of cross-linking of beta1,6-glucosylated mannoproteins to chitin in *Saccharomyces cerevisiae* mutants  
836 with reduced cell wall beta1,3-glucan content. *J Bacteriol.* 1997;179(20):6279-84.
- 837 106. Kapteyn JC, Hoyer LL, Hecht JE, Muller WH, Andel A, Verkleij AJ, et al. The cell wall  
838 architecture of *Candida albicans* wild-type cells and cell wall-defective mutants. *Mol Microbiol.*  
839 2000;35(3):601-11.
- 840 107. Popolo L, Gilardelli D, Bonfante P, Vai M. Increase in chitin as an essential response to defects  
841 in assembly of cell wall polymers in the *ggp1* delta mutant of *Saccharomyces cerevisiae*. *J Bacteriol.*  
842 1997;179(2):463-9.
- 843 108. Dallies N, Francois J, Paquet V. A new method for quantitative determination of polysaccharides  
844 in the yeast cell wall. Application to the cell wall defective mutants of *Saccharomyces cerevisiae*. *Yeast.*  
845 1998;14(14):1297-306.
- 846 109. Osmond BC, Specht CA, Robbins PW. Chitin synthase III: synthetic lethal mutants and "stress  
847 related" chitin synthesis that bypasses the *CSD3/CHS6* localization pathway. *Proc Natl Acad Sci U S A.*  
848 1999;96(20):11206-10.
- 849 110. Lagorce A, Le Berre-Anton V, Aguilar-Uscanga B, Martin-Yken H, Dagkessamanskaia A,  
850 Francois J. Involvement of *GFA1*, which encodes glutamine-fructose-6-phosphate amidotransferase, in  
851 the activation of the chitin synthesis pathway in response to cell-wall defects in *Saccharomyces*  
852 *cerevisiae*. *Eur J Biochem.* 2002;269(6):1697-707.
- 853 111. Perez J, Arcones I, Gomez A, Casquero V, Roncero C. Phosphorylation of *Bni4* by MAP kinases  
854 contributes to septum assembly during yeast cytokinesis. *FEMS Yeast Res.* 2016;16(6).
- 855 112. Heinisch JJ, Rodicio R. Protein kinase C in fungi-more than just cell wall integrity. *FEMS*  
856 *Microbiol Rev.* 2018;42(1).

- 857 113. Larson JR, Kozubowski L, Tatchell K. Changes in Bni4 localization induced by cell stress in  
858 *Saccharomyces cerevisiae*. *J Cell Sci.* 2010;123(Pt 7):1050-9.
- 859 114. Harris SD, Morrell JL, Hamer JE. Identification and characterization of *Aspergillus nidulans*  
860 mutants defective in cytokinesis. *Genetics.* 1994;136(2):517-32.
- 861 115. Momany M, Westfall PJ, Abramowsky G. *Aspergillus nidulans* swo mutants show defects in  
862 polarity establishment, polarity maintenance and hyphal morphogenesis. *Genetics.* 1999;151(2):557-67.
- 863
- 864
- 865

866 **Supporting information**

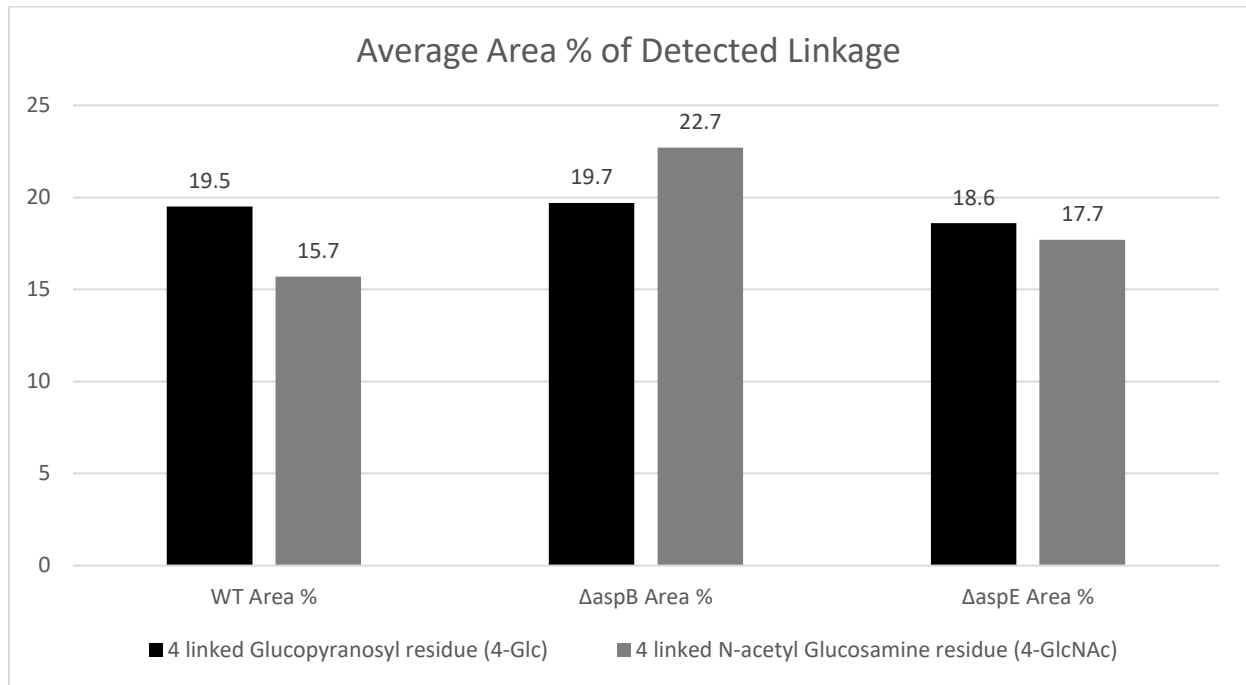

867

868 **S1 Fig. Cell wall glycosyl linkage analysis shows increased chitin content in  $\Delta$ aspB<sup>cdc3</sup> septin null**  
 869 **mutant.** Results of cell wall polysaccharide glycosyl linkage analysis using GC MS/MS showing the  
 870 average area (%) of detected linkages of 4-linked glucose and 4-linked N-acetyl glucosamine. Two  
 871 independent biological replicates gave similar results. A representative data set is shown. Samples: WT,  
 872  $\Delta$ aspB<sup>cdc3</sup>, and  $\Delta$ aspE.

873

874

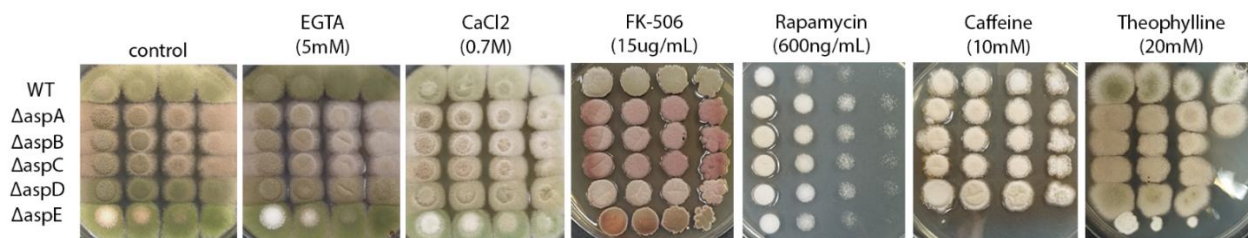

875

876 **S2 Fig. Core septin null mutants are not sensitive to treatments which disrupt the Ca<sup>2+</sup>/Calcineurin**  
 877 **or TOR pathway. AspE is hypersensitive to treatments which disrupt the TOR pathway.** WT and  
 878 septin null mutants  $\Delta$ aspA<sup>cdc11</sup>,  $\Delta$ aspB<sup>cdc3</sup>,  $\Delta$ aspC<sup>cdc12</sup>,  $\Delta$ aspD<sup>cdc10</sup>, and  $\Delta$ aspE were tested for sensitivity by  
 879 spotting decreasing spore concentrations on complete media plates with or without Calcium/Calcineurin  
 880 pathway-disturbing agents (EGTA, CaCl<sub>2</sub>, and FK-506) or Target of Rapamycin (TOR) pathway-  
 881 disturbing agents (Rapamycin, caffeine, and theophylline). Differences in colony color result from  
 882 changes in spore production, spore pigment, and production of secondary metabolites under stress. Spore  
 883 concentrations were [10<sup>7</sup> conidia/mL – 10<sup>4</sup> conidia/mL] for all assays in figure. N=3

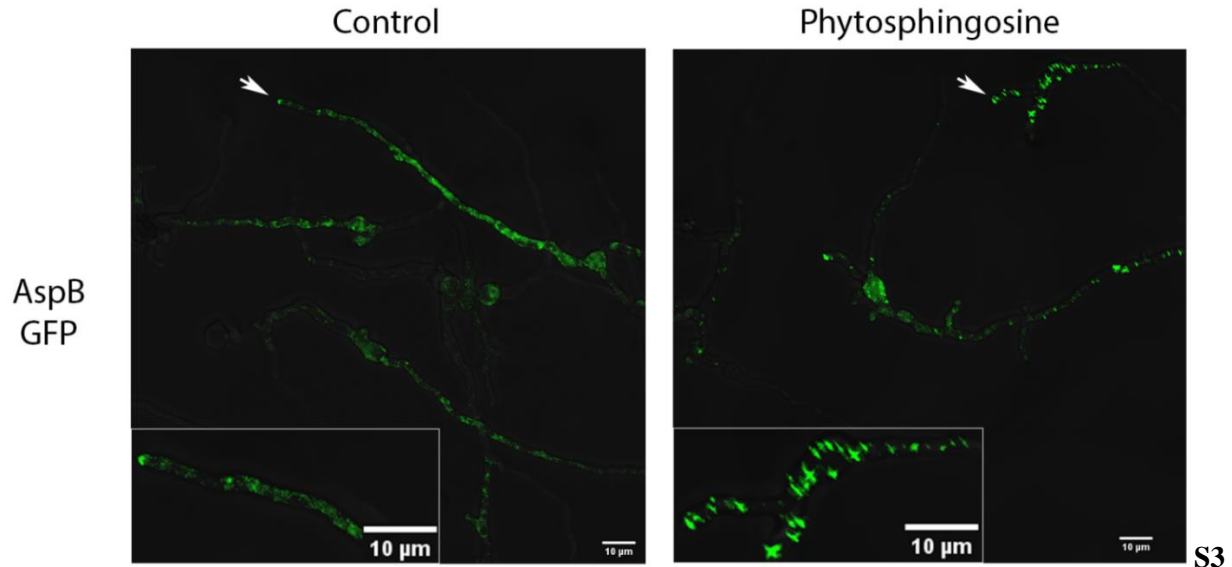

884  
885 **Fig. Septin AspB-GFP localization disrupted by sphingolipid biosynthesis intermediate**  
886 **phytosphingosine.** AspB-GFP strain incubated in liquid media for approximately 16h and imaged 180  
887 minutes after replacing with fresh media containing sphingolipid biosynthesis-inhibiting agents.  
888 Representative images are shown from three independent biological replicates, with  $\geq 100$  cells observed.  
889 (Left Panel) AspB-GFP in vehicle control treatments and (Right Panel) phytosphingosine (15 $\mu$ M)  
890 treatment. Enlarged section of micrographs from each picture to better visualize pattern of fluorescence.  
891 White arrows denote hyphae which are highlighted in enlarged images. Imaging conducted with  
892 Deltavision I deconvolution inverted fluorescence microscope. Scale bars = 10 $\mu$ m. N=3  
893  
894

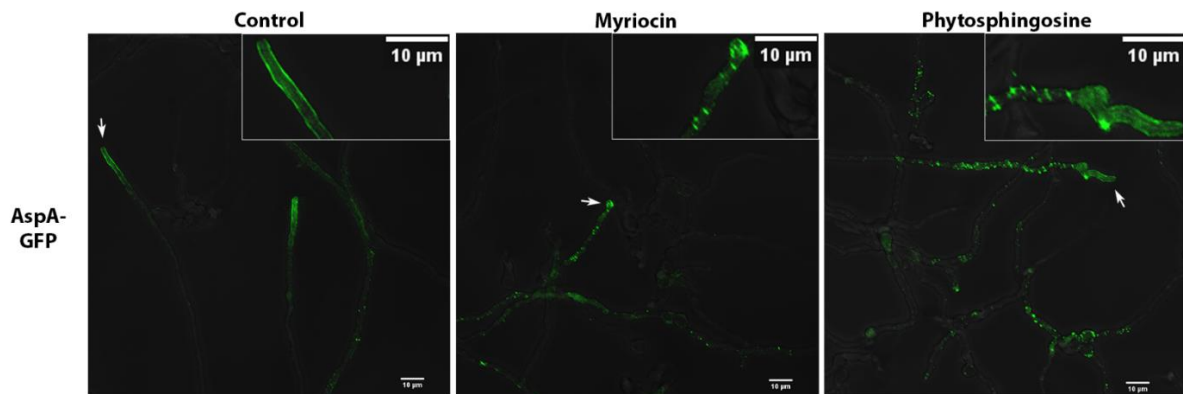

895  
896 **S4 Fig. Septin AspA-GFP localization disrupted by sphingolipid biosynthesis inhibitors.** AspA-GFP  
897 strain incubated in liquid media for approximately 16h and imaged 180 minutes after replacing with fresh  
898 media containing sphingolipid biosynthesis-inhibiting agents. Representative images are shown from  
899 three independent biological replicates, with  $\geq 100$  cells observed. (Left Panel) AspA-GFP in vehicle  
900 control treatment, (Middle Panel) Myriocin (17.5 $\mu$ g/mL) and (Right Panel) phytosphingosine (15 $\mu$ M)  
901 treatment. Enlarged section of micrographs from each picture to better visualize pattern of fluorescence  
902 signal. White arrows denote hyphae which are highlighted in enlarged images. Imaging conducted with  
903 Deltavision I deconvolution inverted fluorescence microscope. Scale bars = 10 $\mu$ m. N=3

904 **S1 Table.** List of fungal strains used in this study.

| Strain Number                       | Genotype                                                                                            | Source                           |
|-------------------------------------|-----------------------------------------------------------------------------------------------------|----------------------------------|
| FGSC A850 (WT)                      | biA1; _argB::trpC_B; methG1; veA1; trpC801                                                          | FGSC                             |
| ASH5 ( $\Delta aspA$ )              | aspA::argB2 biA1 argB::trpC_B methG1 veA1 trpC801                                                   | Lindsey and Momany, 2010         |
| AYR32 ( $\Delta aspB$ )             | aspB::AfpyrG; pyroA4; argB2                                                                         | Hernandez-Rodriguez et al., 2012 |
| ARL161 ( $\Delta aspC$ )            | aspC::AfpyrG pyrG89 biA1 argB::trpC_B methG1 veA1 trpC801                                           | Lindsey and Momany, 2010         |
| AKK3 ( $\Delta aspD$ )              | aspD::AfpyrG; pyroA4; argB2                                                                         | Hernandez-Rodriguez et al., 2014 |
| ASH41 ( $\Delta aspE$ )             | aspE::AfpyrG; riboB2                                                                                | Hernandez-Rodriguez et al., 2012 |
| ANID_05666 ( $\Delta mpkA$ )        | pyrG89; argB2; $\Delta nkuA(ku70)$ ::argB; $\Delta mpkA$ ::pyrG;pyroA                               | CP De Souza et al., 2013         |
| AAM016 ( $\Delta mpkA\Delta aspB$ ) | aspB::AfpyrG; pyroA4; argB2 + pyrG89; argB2; $\Delta nkuA(ku70)$ ::argB; $\Delta mpkA$ ::pyrG;pyroA | This study                       |
| AAM017 ( $\Delta mpkA\Delta aspB$ ) | aspB::AfpyrG; pyroA4; argB2+ pyrG89; argB2; $\Delta nkuA(ku70)$ ::argB; $\Delta mpkA$ ::pyrG;pyroA  | This study                       |

|                                          |                                                                                                                         |                             |
|------------------------------------------|-------------------------------------------------------------------------------------------------------------------------|-----------------------------|
| AAM019<br>( $\Delta$ mpkA $\Delta$ aspE) | aspE::AfpyrG; riboB2+<br>pyrG89;argB2; $\Delta$ nkuA(ku70)::argB; $\Delta$ mpkA::pyrG;pyroA                             | This study                  |
| AAM020<br>( $\Delta$ mpkA $\Delta$ aspE) | aspE::AfpyrG; riboB2+ pyrG89;<br>argB2; $\Delta$ nkuA(ku70)::argB; $\Delta$ mpkA::pyrG;pyroA                            | This study                  |
| ARL141                                   | <i>aspA-GFP-AfpyrG pyrG89 biA1 argB::trpC_B methG1</i><br><i>veA1 trpC801</i>                                           | Lindsey and<br>Momany, 2010 |
| EB-5                                     | <i>biA1 pyrG89 argB2 pyroA4 wA3 <math>\Delta</math>chsB::pyr-4-alcA(p)-</i><br><i>chsB argB::chsB(p)-egfp-chsB</i>      | Fukuda et al.,<br>2009      |
| AAM022                                   | <i>aspA::argB2 biA1 pyrG89 argB2 wA3 <math>\Delta</math>chsB::pyr-4-</i><br><i>alcA(p)-chsB argB::chsB(p)-egfp-chsB</i> | This study                  |

905

906 **S2 Table.** List of primers and sequences used in this study.

| Primer Name  | Primer Sequence                       |
|--------------|---------------------------------------|
| PyrG-Af-R'   | 5'-CAG AGC CCA CAG AGC GCC TTG AG-3'  |
| AspB-KO-F'   | 5'-GGT CAT TCC TGG TGT GAC AGT ACC-3' |
| AspE-KO-F'   | 5'-GAT CCA AAT TCC AGG TTC GAT GAC-3' |
| MpkA-806-F'  | 5'-ATC CTA GAC TCG ACG CCT CA-3'      |
| MpkA-3779-R' | 5'-ACA AAA ACC CCA TCG TCC GA-3'      |
| AspA-KO-F'   | 5'-TAG ATC AAG CTC CGC CGG AA-3'      |
| AspA-KO-R'   | 5'-TGA CTC CAG CGA CGA TGA GT-3'      |

907
